# Supplementary material for: “Positive Regulation of RNA Metabolic Process” Ontology Group Highly Regulated in Porcine Oocytes Matured In Vitro: A Microarray Approach
Source: Biomed Res Int. 2018 Jan 10;2018:2863068. doi: 10.1155/2018/2863068 (PMC5818922; doi:10.1155/2018/2863068)
Supplement: Supplementary Materials — The MIME (Minimal Information about a Microarray Experiment) of porcine oocytes maturation in vitro described in GEO (Gene Expression Omnibus). [file 2863068.f1.xls]

## Sheet: Metadata Template
# Use this template for 3' or whole Gene expression studies when summarization probe set data will be provided in Matrix table format (click on additional worksheet tabs below)
# Incomplete submissions will be returned. Click the Metadata Example tab below to view a completed worksheet
# Field names (in blue on this page) should not be edited. Hover over cells containing field names to view field content guidelines or,
# CLICK HERE for Field Content Guidelines Web page.
SERIES
# This section describes the overall experiment.
title	porcine oocytes maturation in vitro
summary	The proper mammalian oocytes maturation is recognized as reaching MII stage and accumulation of mRNA and proteins in cell cytoplasm following fertilization. The proper course of folliculogenesis and oogenesis is orchestrated with morphogenesis significantly influencing further zygote formation and embryos growth. This study was aimed to determinate new transcriptomic markers of porcine oocytes mo…
summary	We used microarrays to detail the global programme of gene expression underlying changes before and after in vitro maturation of oocytes in sus scrofa
overall design	Pig oocytes were aspired from porcine ovaries, selected to two groups by BCB test, subjected to in vitro maturation, RNA extraction, reverse transcription, and hybridization on Affymetrix microarrays. Only oocytes of grade I with homogeneous ooplasm were considered for the following steps of the experiment, resulting 300 grade I oocytes (3 x n=50 before in vitro maturation, 3 x n=50 after In vitr…
contributor	Bartosz Kempisty
contributor	Joanna Budna
contributor	Piotr Celichowski
SAMPLES
# The Sample names in the first column are arbitrary but they must match the column headers of the Matrix table (see next worksheet).
# CLICK HERE to find the Affymetrix platform accession number (GPLxxxx).
Sample name	title	CEL file	source name	organism	characteristics: tissue	molecule	label	description	chip name or GEO platform id
Vitro1	in vitro-maturated oocyte, biological rep1	Vitro2.ga.cel	pubertal crossbred Landrace gilt	Sus scrofa	oocyte	cDNA	Biotin	Gene expression data from In vitro-maturated porcine oocytes	GPL18699
Vitro2	in vitro-maturated oocyte, biological rep2	Vitro3.ga.cel	pubertal crossbred Landrace gilt	Sus scrofa	oocyte	cDNA	Biotin	Gene expression data from In vitro-maturated porcine oocytes	GPL18699
Vitro3	in vitro-maturated oocyte, biological rep3	Vitro4.ga.cel	pubertal crossbred Landrace gilt	Sus scrofa	oocyte	cDNA	Biotin	Gene expression data from In vitro-maturated porcine oocytes	GPL18699
Vivo1	oocyte in vivo, biological rep1	Vivo22.ga.cel	pubertal crossbred Landrace gilt	Sus scrofa	oocyte	cDNA	Biotin	Gene expression data from porcine oocytes before In vitro maturation	GPL18699
Vivo2	oocyte in vivo, biological rep2	Vivo3.ga.cel	pubertal crossbred Landrace gilt	Sus scrofa	oocyte	cDNA	Biotin	Gene expression data from porcine oocytes before In vitro maturation	GPL18699
Vivo3	oocyte in vivo, biological rep3	Vivo4.ga.cel	pubertal crossbred Landrace gilt	Sus scrofa	oocyte	cDNA	Biotin	Gene expression data from porcine oocytes before In vitro maturation	GPL18699
PROTOCOLS
# This section includes protocols and fields which are common to all Samples.
# Protocols which are applicable to specific Samples or specific channels should be included in additional columns of the SAMPLES section instead.
collection protocol	Ovaries and reproductive tracts were recovered at slaughter and transported to the laboratory at 38o C in 0.9% NaCl within 40 min. Cumulus-oocyte-complexes were selected under an inverted microscope, counted, and morphologically evaluated.
in vitro maturation protocol	Cumulus-oocyte-complexes were cultured in 500 μl of standard porcine IVM culture medium TCM-199 (tissue culture medium) with Earle’s salts and L-glutamine, (Gibco BRL Life Technologies, Grand Island, NY, USA) supplemented with 2.2 mg/ml sodium bicarbonate (Nacalai Tesque, Inc., Kyoto, Japan), 0.1 mg/ml sodium pyruvate (Sigma-Aldrich, St. Louis, MO, USA), 10 mg/ml BSA (bovine serum albumin), (Sigm…
extract protocol	Total RNA was extracted from samples using TRI Reagent (Sigma, St Louis, MO, USA) and RNeasy MinElute cleanup Kit (Qiagen, Hilden, Germany).
reverse transcription	Total RNA (100 ng) from each pooled sample was subjected to two round, sense cDNA amplification (Ambion® WT Expression Kit).
label protocol	Biotin labeling and fragmentation were performed by Affymetrix GeneChip® WT Terminal Labeling and Hybridization (Affymetrix).
hyb protocol	Biotin-labeled fragments of cDNA (5.5 μg) were hybridized to the Affymetrix® Porcine Gene 1.1 ST Array Strip (48°C/20 h), washed and stained using the Affymetrix GeneAtlas Fluidics Station according to the manufacturer technical protocol
scan protocol	The array strips were scanned employing Imaging Station of the GeneAtlas System.
data processing	Obtained cell files were submied to bioconductor and R programing lenguage. Each CEL file was merged with a description file. In order to correct background, normalize, and summarize results, we used the Robust Multiarray Averaging (RMA) algorithm.
value definition	Robust Multiarray Averaging (RMA) algorithm

## Sheet: Matrix Template
# Template for an Affymetrix matrix table submission.
# The ID_REF column should include the full list of probeset ids of the Affymetrix array (see Matrix Example tabs at bottom)
# The sample names in the Matrix table (e.g. 'SAMPLE 1') must match the Sample name in the SAMPLES section of the Metadata file.
# The Matrix table should include summarized/scaled/normalized probeset data generated by GC-RMA, dCHIP, MAS 5.0, or whatever algorithm/software was used for primary analysis.
# If submitting MAS 5.0 data as a Matrix table, we recommend adding ABS_CALL and DETECTION P-VALUE columns to this template (see 'Matrix Example 2' tab at bottom)
# P-values or other measurements can be added as additional columns for each sample (see 'Matrix Example 2' tab)
ID_REF	Vitro1	Vitro2	Vitro3	Vivo1	Vivo2	Vivo3
15183086	4.90987	4.76934	4.85231	4.66703	4.77972	4.73367
15183109	4.00235	3.76098	3.91396	3.76674	3.77221	3.89207
15183135	5.65774	5.68092	5.59382	5.48034	5.32251	5.23169
15183141	4.86118	5.08563	4.76547	4.79907	4.62359	4.51363
15183149	5.36445	5.47349	5.19567	6.1473	6.05284	5.94257
15183162	4.35058	4.35387	4.36463	4.05376	4.25165	4.12731
15183171	5.80782	5.91868	6.05251	5.69589	5.46316	5.29386
15183193	3.89227	3.86449	3.95843	3.73259	3.62779	3.59649
15183206	4.91041	4.99678	5.08137	4.88843	4.89399	4.9077
15183222	7.93788	8.15931	8.09393	8.15837	8.27292	7.38626
15183232	4.02314	4.25772	4.14866	4.05878	4.16251	4.01292
15183234	8.73408	8.74061	8.74458	8.78891	8.48957	8.66918
15183265	4.03955	4.1686	4.1658	4.02661	4.01778	4.09108
15183277	4.80595	4.60026	4.76695	4.51663	4.44194	4.45758
15183285	9.23639	9.32029	9.18917	9.61208	9.47548	9.78952
15183302	8.32807	8.66917	8.45046	8.33071	8.39173	8.18393
15183308	5.00971	4.88405	4.6848	4.78511	4.61725	4.67341
15183320	3.75229	3.99016	4.05381	4.03093	3.69759	3.93691
15183323	5.92018	5.96409	6.09101	5.85716	6.009	5.65283
15183332	9.91779	9.91362	10.0107	9.55994	9.74869	9.56839
15183348	7.48608	7.07781	7.51432	7.55765	7.14607	7.51313
15183360	8.49228	8.53448	8.46293	8.29029	8.31745	7.99263
15183385	5.48569	5.90075	5.93198	6.07248	5.72906	5.46093
15183407	3.88964	4.02217	3.87856	3.49275	3.7404	3.74048
15183409	3.52531	3.9591	3.7031	3.51443	3.46954	3.67593
15183414	5.33737	5.44853	5.43285	5.62874	5.40478	5.58791
15183422	11.038	11.0464	11.1056	10.7292	10.8065	10.9519
15183428	3.53821	3.43128	3.40456	3.24349	3.31027	3.24629
15183432	6.37849	6.66505	6.81547	7.19829	6.85566	7.84592
15183461	6.89297	6.61066	6.94506	7.28042	6.9661	7.44221
15183516	5.58025	5.52591	5.94932	6.01077	6.08759	6.03934
15183529	7.67917	7.52142	7.5202	7.64658	7.53317	7.22765
15183534	4.83582	5.07144	4.62562	4.44526	4.61653	4.59479
15183536	3.8323	4.05744	3.73602	3.60514	3.74203	3.47624
15183544	5.59764	5.8545	5.69123	6.00258	5.60268	5.94709
15183563	7.85552	7.92567	7.87625	7.31795	7.6718	7.83173
15183572	9.00761	9.09881	8.9809	8.86396	8.85388	9.23464
15183586	5.0902	5.01457	5.02946	5.04046	4.79165	4.86437
15183592	3.44899	3.36219	3.63717	3.26885	3.44344	3.46321
15183597	9.54783	9.49284	9.47465	9.29595	9.43615	9.34168
15183609	4.83001	4.7395	4.91854	5.08828	5.02614	5.44518
15183637	9.76917	9.93827	9.84884	9.56216	9.74849	10.152
15183640	3.58164	3.75431	3.61385	3.61294	3.74677	3.612
15183649	9.91615	9.73309	9.88774	9.93118	9.39631	9.39433
15183653	4.46317	4.75218	4.45488	4.71363	4.99767	5.33566
15183665	6.58933	6.4005	6.4442	6.80569	7.01258	7.23593
15183673	4.52963	4.24866	4.57955	4.48818	4.66202	4.64948
15183682	3.977	3.69789	4.04253	4.27175	3.7799	4.08186
15183703	10.5837	10.5037	10.4999	10.4657	10.3507	10.4848
15183724	9.54271	9.12324	9.3269	9.14884	8.56663	8.72035
15183742	11.6607	11.6503	11.6587	11.4751	11.6317	11.6704
15183744	5.42135	5.27682	6.02902	6.90044	6.15476	6.37454
15183748	4.32182	4.29985	4.19101	4.10708	4.29654	4.01529
15183750	6.2231	5.9772	6.38977	6.47281	6.42329	6.64144
15183758	5.68245	5.76026	5.52625	5.40309	5.37321	5.28663
15183776	9.35294	9.39936	9.18645	9.42734	9.23605	9.49973
15183785	8.02962	8.23274	8.17375	7.93811	8.07128	8.22512
15183810	4.3012	4.15654	4.2372	4.14046	4.07308	4.16202
15183850	4.30945	4.28028	4.38605	4.57564	4.53974	5.42763
15183864	3.35879	3.5487	3.58683	3.40357	3.40398	3.36405
15183873	3.78929	3.64127	3.49975	3.77007	3.53981	3.64187
15183880	3.78516	3.86233	3.79726	3.86588	3.64132	3.9188
15183890	3.57575	3.5748	3.38804	3.4215	3.41787	3.44429
15183892	3.75557	3.85874	3.65595	3.49249	3.69413	3.62337
15183894	3.56982	3.75695	3.59793	3.40198	3.59998	3.41122
15183896	4.78075	4.93461	4.44836	4.21032	4.57905	4.34145
15183898	3.15238	3.28193	3.2117	3.2025	3.30003	3.20546
15183900	3.38887	3.27708	3.52186	3.24059	3.28848	3.27393
15183903	9.17662	9.31633	9.12789	8.95359	9.15352	9.28389
15183916	4.15829	4.2391	4.16897	4.22437	4.20235	4.38576
15183929	8.64978	7.7583	6.96542	9.76799	8.86339	9.04739
15183935	3.94506	3.95817	3.88839	3.80013	3.84588	3.84476
15183956	3.48901	3.64822	3.52405	3.86105	3.96473	4.64289
15183981	3.46227	3.38497	3.39377	3.40461	3.40832	3.4208
15183992	3.41279	3.56227	3.48015	3.31955	3.42965	3.25925
15184024	3.93242	3.6806	3.64803	3.6901	3.79302	3.58843
15184054	3.10389	3.02399	3.04089	3.00112	3.08189	3.00781
15184058	4.60484	4.89744	4.71594	4.64449	4.70572	4.99736
15184066	7.79151	7.98694	8.07906	8.25146	8.35278	8.6934
15184088	9.53996	9.68268	9.61576	9.34501	9.46212	9.68228
15184117	4.53745	4.23449	4.47024	4.1111	4.28683	4.20254
15184119	6.97488	7.03988	7.29168	8.2635	7.50292	7.99605
15184148	6.54804	6.54478	6.74057	6.43248	6.49819	6.49596
15184175	4.02511	4.13274	3.98353	3.85721	3.73894	3.71562
15184182	8.58324	8.56357	8.60732	8.0698	8.1346	8.4177
15184193	4.22531	4.20829	4.01897	3.9032	4.20464	4.051
15184199	4.07575	3.86717	3.98532	3.89672	3.90885	3.80428
15184204	3.05028	3.27754	3.20342	2.98594	3.08457	2.9273
15184206	6.30033	6.62507	6.53938	6.27469	6.41698	6.55548
15184217	3.44125	3.77113	3.62029	3.6153	3.55075	3.56176
15184221	10.1455	10.1878	10.1981	10.2051	10.2096	10.4682
15184242	4.18846	4.34122	4.09194	4.59581	4.74015	5.20246
15184256	4.17402	4.36047	4.26066	4.17703	4.16105	4.01949
15184293	7.14228	6.9758	7.20014	7.31117	7.17933	7.99455
15184312	7.41868	7.28761	7.66433	7.46382	7.3991	7.38855
15184330	4.1241	4.20935	3.99675	4.10018	4.13715	4.25144
15184366	5.69075	5.95517	5.99426	5.66434	5.75327	5.67267
15184379	10.2082	9.94195	10.1458	9.77976	10.1295	9.67968
15184389	7.64312	8.20173	8.27651	7.65121	8.17902	7.78965
15184411	8.19539	8.15033	8.56413	8.25887	8.37961	7.94791
15184414	3.88104	3.87542	3.92902	3.75581	3.8045	3.79872
15184420	8.20275	8.41242	8.57403	8.30264	8.61943	8.64022
15184468	3.40999	3.40078	3.25532	3.24289	3.33451	3.35569
15184482	6.55176	6.37225	6.14806	6.42112	6.62587	7.2149
15184490	4.64653	4.62956	4.64529	5.12463	5.08503	5.51601
15184493	7.83594	7.80843	7.85635	7.6322	7.54354	7.44889
15184507	8.75686	8.74517	8.82437	8.78869	8.59328	8.80013
15184513	5.99457	5.82443	6.3699	6.49663	6.52948	6.89731
15184581	8.52328	8.58947	8.77757	9.13351	9.15876	9.68901
15184586	3.90863	4.04481	4.42702	3.68774	4.07922	4.04342
15184588	9.64472	9.71335	9.77256	9.65556	9.64362	9.86808
15184608	3.56499	3.74789	3.65402	3.5517	3.57709	3.50212
15184615	7.57361	7.51759	7.74195	7.78124	7.67855	7.6135
15184623	10.6262	10.8518	10.6336	10.2479	10.6617	10.797
15184635	5.79828	5.78147	5.78865	5.60038	5.54879	6.06644
15184640	4.75797	4.76852	4.71672	4.60512	4.7162	4.45419
15184647	4.01007	4.08254	4.21173	4.09159	4.29919	4.20718
15184664	7.78421	8.02138	7.90105	7.51778	7.92031	8.03733
15184676	4.38884	4.38165	4.23527	4.24105	4.28068	4.18505
15184680	7.40419	7.23267	7.39228	7.42231	7.21269	6.63588
15184688	10.0071	10.2172	10.1564	9.87963	10.0577	10.068
15184693	9.03614	9.25217	9.05085	8.82238	8.85505	9.13965
15184705	5.39077	5.15921	5.69778	5.36652	5.68566	5.59885
15184717	6.85969	6.97327	6.72509	7.05818	7.27078	7.00049
15184724	6.8754	6.57572	6.58337	7.56176	6.20982	6.93086
15184732	8.37709	8.28077	8.33233	7.97971	8.07803	7.91422
15184746	4.16074	3.9067	4.26483	4.04349	4.45724	4.68962
15184755	8.86734	8.66196	8.8726	8.65627	8.57775	8.77084
15184780	4.18915	4.24261	4.01508	4.26806	3.80426	3.98839
15184792	8.76869	9.09283	8.80947	8.41429	8.89529	8.97974
15184804	10.7377	10.8208	10.8888	10.6106	10.6481	10.8209
15184814	7.56157	7.39708	7.34899	7.71326	7.66185	8.23337
15184835	5.16625	5.43608	4.90953	4.83084	4.87392	5.18265
15184844	6.92373	7.28608	7.32301	7.21769	7.29766	7.37188
15184872	5.06248	5.27081	5.02367	5.60761	5.40289	5.54314
15184879	6.1313	6.07921	6.45468	5.95831	5.84561	5.966
15184897	3.3067	3.15761	3.17821	3.3144	3.29815	3.40461
15184906	11.2081	11.0839	11.2562	11.1685	11.1302	11.2436
15184913	8.86455	9.14752	9.01628	8.93512	8.72319	8.94839
15184917	7.74947	7.88928	7.77335	7.66078	7.86462	8.51041
15184924	9.00523	8.87542	9.28253	8.98163	9.14259	9.06992
15184929	9.54877	9.46349	9.62901	9.58369	9.38783	9.42063
15184944	3.71509	3.72593	3.48677	3.90839	3.88452	3.54181
15184950	3.91156	3.65258	3.64092	3.55504	3.72027	3.50466
15184969	6.59099	6.68009	6.70728	6.95739	6.90083	7.2301
15184982	3.9226	4.03621	3.84277	3.74855	3.89817	3.67665
15184985	4.78505	4.61082	4.96249	4.92396	4.81391	4.65145
15184997	3.14013	3.21165	3.35703	3.27165	3.16659	3.18221
15185007	3.66924	3.77125	3.53043	3.53143	3.58005	3.50639
15185012	4.39689	4.59358	4.28543	4.32651	4.26613	3.98236
15185014	8.41544	8.55886	8.47313	8.32066	8.35892	8.39406
15185029	5.9192	5.90541	5.91609	6.23681	6.46356	6.3387
15185046	7.97158	8.27088	7.9804	8.31789	8.08458	8.43668
15185065	5.25377	5.69307	5.38138	6.55852	5.58075	5.77514
15185069	8.91596	9.01031	9.07127	9.18649	8.78449	8.9315
15185080	4.39461	4.75023	4.70236	4.41472	4.71717	4.64835
15185109	5.42291	4.89961	5.29145	5.36136	4.97676	4.63767
15185111	3.46754	3.49758	3.30417	3.35752	3.27845	3.2844
15185131	7.2209	7.05486	7.38173	6.99196	7.56064	7.40772
15185148	6.93729	6.90383	6.87699	7.44288	6.41238	7.09847
15185185	9.84562	9.93915	9.87851	9.86634	9.89467	9.8827
15185195	5.18602	5.21046	5.15339	5.68684	5.5018	5.57867
15185201	5.12327	5.0181	5.19227	4.95765	4.63389	4.62497
15185208	4.35282	4.43998	4.20724	4.04802	4.10381	4.10696
15185238	5.29354	5.66957	4.95496	5.00202	5.02143	4.77984
15185242	6.69125	6.59093	6.80335	6.96474	6.70089	6.78086
15185251	8.66669	8.69588	8.69984	8.93127	9.03526	8.90586
15185267	4.02846	4.01749	4.10551	3.94671	3.79005	3.97384
15185271	6.38868	6.65008	6.78983	6.209	6.29037	6.388
15185283	5.04464	4.91062	4.69504	4.33665	4.42491	4.26582
15185303	10.1428	10.1549	10.1842	10.1605	10.2657	10.2653
15185311	6.52395	6.28469	6.18406	6.34694	6.18165	5.91071
15185317	10.7894	10.8343	10.9161	10.7074	10.8293	10.8591
15185359	9.35387	9.36754	9.46057	9.25626	9.1156	9.11092
15185406	5.50406	5.49308	5.98775	6.54873	6.32755	6.58855
15185439	6.99819	7.14505	7.21518	7.1553	7.15874	7.22075
15185449	7.81904	7.88674	8.15618	7.63955	8.06807	7.83922
15185459	4.34888	4.21352	4.70929	4.74436	4.17437	4.54764
15185461	11.8995	11.5668	11.5755	11.6874	11.2031	11.2931
15185469	5.84274	5.20335	5.35141	5.75138	5.48054	5.52566
15185490	8.07099	7.94953	8.00972	8.04262	8.2692	8.42421
15185495	4.86778	5.03524	4.78584	4.68078	4.87422	4.6779
15185587	3.08239	3.16291	3.26935	3.09226	3.08163	3.08926
15185601	7.16991	7.20522	7.77043	7.01264	7.1479	7.46579
15185609	9.76262	9.72512	9.79139	9.60293	9.66424	9.40491
15185621	7.71442	7.82017	7.89811	7.79909	7.87865	8.34255
15185713	9.24616	9.47743	9.44444	9.35091	9.55181	9.49511
15185743	5.30772	5.34738	5.69588	6.33171	5.97184	6.49594
15185747	10.5158	10.4711	10.5051	10.4067	10.4872	10.3796
15185753	4.68039	4.68616	5.07782	4.67342	4.87023	5.11805
15185767	3.37958	3.29411	3.16345	3.2776	3.35604	3.33263
15185770	9.18881	9.29305	9.06415	8.82584	9.20482	9.21655
15185786	8.2678	8.227	8.36744	8.28156	7.88479	8.35685
15185792	3.94819	4.10547	4.01134	4.07797	3.81321	3.98388
15185817	3.65315	3.57549	3.88416	3.37769	3.37718	3.6055
15185821	7.75411	7.54776	7.64104	7.44022	7.34057	7.50599
15185842	10.4731	10.4868	10.4067	10.3107	10.3662	10.2544
15185845	5.17093	5.42884	5.39698	5.26092	5.47066	5.2071
15185866	3.20096	3.16476	3.19785	3.24266	3.16698	3.30911
15185868	9.1221	9.32109	9.26509	8.95024	9.09188	9.15883
15185883	5.17125	5.39334	5.47686	5.12361	5.2731	5.40409
15185903	5.72675	6.18902	5.97558	5.77241	5.49447	5.36807
15185918	7.6635	7.84182	7.88294	7.7885	7.93285	8.04785
15185924	6.46141	6.60831	7.07588	7.03147	7.00931	7.35303
15185938	8.40546	8.59772	8.41726	8.04833	8.26746	8.37844
15185965	8.7691	8.62044	8.56633	8.63917	8.37112	8.30734
15185978	10.1406	9.83866	9.93101	9.98312	9.96732	9.91634
15185981	8.07544	8.19041	8.1159	8.20841	8.14785	8.1454
15185994	5.02383	4.94678	5.04838	4.70783	4.89941	4.86039
15185998	5.53756	5.58168	5.57916	5.90709	5.6195	6.0741
15186033	8.03275	7.82889	7.9669	7.58441	7.08847	7.39146
15186036	4.98927	4.98948	5.01564	5.03543	4.9899	5.03529
15186055	7.80275	8.0478	7.87411	7.94245	7.79865	8.46065
15186091	3.5722	3.47931	3.52041	3.61803	3.49717	3.38951
15186099	8.64462	8.91761	8.7488	8.7393	8.88678	9.04859
15186116	3.40716	3.50567	3.45798	3.36713	3.38522	3.42547
15186126	5.7118	6.02178	5.9924	5.64252	5.83925	5.73316
15186149	9.77438	9.92101	9.8713	9.87109	9.76128	9.78305
15186160	9.89764	10.2259	10.0056	9.89524	10.0094	10.1669
15186172	9.78368	9.82471	9.79063	9.52033	9.50926	9.68603
15186191	3.76432	3.60122	3.71775	3.55666	3.63008	3.54417
15186204	9.70276	9.87525	9.88316	9.54713	9.78604	9.84112
15186232	7.14379	7.25432	7.22991	7.19307	7.02661	7.14656
15186287	7.75435	7.78972	7.76915	8.1136	8.11683	8.49999
15186305	3.50265	3.64846	3.54575	3.6549	3.48516	3.65485
15186309	4.22394	4.71991	4.55118	4.38344	4.32077	4.31248
15186314	4.43404	4.33908	4.66364	4.33473	4.54574	4.99041
15186319	9.49049	9.61392	9.29013	9.1668	9.24009	9.70329
15186328	4.92603	4.96905	4.86247	5.15209	4.77681	4.89568
15186338	6.35433	5.98831	6.62784	6.0716	6.20605	5.95897
15186344	5.38746	5.50747	5.42973	5.98821	5.99425	5.55801
15186351	4.2972	4.43754	4.24061	4.12884	4.24588	4.1585
15186377	10.4781	10.5052	10.6432	10.4055	10.5397	10.2162
15186393	8.15811	8.20973	8.24525	8.26259	8.36523	8.62592
15186426	6.11325	6.31588	6.26423	7.41336	6.56036	6.87654
15186446	6.90142	6.57112	7.179	7.25078	7.24971	7.5426
15186458	8.30391	7.93363	7.82346	7.91419	7.41691	7.43441
15186471	9.90127	10.0505	9.97483	9.76536	9.88431	9.83733
15186481	4.10466	4.35914	4.20812	4.16657	4.10338	4.34235
15186496	3.91557	3.96128	3.73983	3.90022	3.96948	3.82771
15186508	4.89213	4.8606	5.03556	5.08524	4.95397	4.92577
15186524	4.31461	3.88757	4.15742	3.93143	3.97125	3.60573
15186551	4.22165	4.41695	4.50156	4.06582	4.10957	4.27812
15186581	4.64187	4.39092	4.70854	5.42452	5.18077	5.6276
15186599	4.68243	4.62807	4.82043	5.08538	4.67792	5.00334
15186607	5.91646	5.97276	5.87658	6.50182	6.13032	5.60817
15186620	5.22717	5.52508	5.1987	5.15521	5.33241	5.04772
15186633	4.90874	5.37815	5.26232	4.88685	4.86194	4.859
15186647	8.10931	8.30485	8.19246	8.19856	8.22591	8.58957
15186675	5.86314	5.60847	6.08666	6.28886	6.52065	7.07436
15186690	5.08405	4.90045	5.02034	4.97464	5.1495	5.43215
15186714	5.27422	5.15077	5.31222	5.10858	5.18037	5.36662
15186716	5.33063	5.37151	5.01077	5.08752	4.96773	5.04074
15186721	4.97806	4.97854	5.07193	5.15696	5.07892	5.16001
15186728	8.07364	8.08737	8.18689	8.02177	8.12154	8.44875
15186749	8.17901	8.22596	8.0433	8.22049	8.01132	8.15505
15186775	5.01011	4.86826	4.69095	4.60707	4.49887	4.52059
15186794	9.21738	8.8565	9.00457	8.80215	8.5825	8.42667
15186802	9.78367	9.72619	9.77348	9.46398	9.48702	9.18885
15186815	9.09716	9.08155	8.96001	9.2936	9.15145	8.79505
15186820	4.97655	5.13953	4.81884	4.7958	4.83544	4.63259
15186880	7.7908	7.83699	8.22627	7.72896	7.97635	8.27622
15186882	4.78961	4.81058	4.92857	4.70743	4.9806	4.76526
15186887	7.39183	7.24877	7.21835	7.32345	7.10406	6.927
15186917	7.29695	7.05508	7.27298	7.33728	7.15623	6.93605
15186944	7.14808	7.04216	7.3178	7.47265	7.55339	7.81739
15186952	9.42653	9.57267	9.48433	9.83114	9.55006	9.52737
15186964	7.58235	7.4992	7.65957	7.44662	7.41559	7.65856
15186998	4.92992	4.80493	4.59629	5.21461	4.7639	4.56908
15187002	4.98813	4.87429	4.7769	4.71044	5.09297	4.75227
15187006	7.89973	8.33136	8.26131	8.34289	8.3626	7.93329
15187017	7.72378	7.62432	7.63342	7.74623	7.5694	7.2751
15187031	7.74871	7.51055	8.07793	7.48209	7.81349	7.50536
15187045	5.05768	5.6685	5.15877	5.06747	5.01737	4.95703
15187056	4.36409	4.57073	4.5151	4.38851	4.3073	4.14695
15187075	4.39319	4.4968	4.28527	4.08278	4.21642	3.97764
15187082	6.01674	6.20742	6.45783	6.36112	6.5711	6.8862
15187086	4.55237	4.82741	4.60159	4.39804	4.25272	4.46868
15187089	4.02481	4.11553	4.46089	3.79583	3.90001	4.33342
15187096	6.74922	6.7115	6.96363	6.49774	6.59417	6.31343
15187123	7.18526	6.97825	7.33656	7.29362	6.95891	7.11848
15187158	6.80508	6.63132	6.79721	6.43061	6.35618	6.2163
15187165	7.99257	7.90163	8.15938	7.42907	7.7205	7.64459
15187168	8.48938	8.57377	8.76942	8.44273	8.53301	8.8821
15187182	5.48406	5.58088	5.39552	5.93616	5.96015	6.04766
15187189	9.39763	9.25742	9.35943	9.20747	9.0967	8.70481
15187191	3.8369	4.14726	3.86564	3.81849	3.8278	3.51835
15187208	7.19595	6.80273	7.55705	7.89901	7.66463	8.16009
15187223	9.31246	9.07078	9.07428	8.77785	9.15112	9.02341
15187229	8.486	8.15999	8.49774	8.22732	8.03582	8.05792
15187236	4.27216	4.48773	4.21403	4.1863	4.05359	4.01248
15187275	3.73189	3.72054	3.72799	3.52659	3.75367	3.61137
15187279	7.72798	7.5383	7.56683	7.96812	7.9144	7.97698
15187295	4.08299	4.07118	3.97422	4.13859	4.18652	4.17963
15187314	7.06683	6.8644	7.08934	7.36852	7.56619	7.70603
15187329	5.36745	5.78544	5.56943	5.76737	5.57174	5.47987
15187348	7.537	7.51029	7.37239	7.78834	7.79138	7.51209
15187350	3.94767	4.08331	3.90936	3.79115	3.82769	3.68384
15187375	7.90303	7.96107	8.12368	7.84813	7.93616	8.26633
15187392	7.11323	6.8	6.79414	7.42304	6.92233	7.34608
15187406	3.52716	3.59145	3.56498	3.50767	3.50129	3.33975
15187420	10.0625	10.1201	10.0844	9.89824	9.92198	9.96677
15187426	6.1666	6.16367	6.53108	6.68376	6.63253	7.04858
15187433	4.19436	4.41521	4.02161	4.03135	3.84268	3.88439
15187447	7.20951	7.49364	7.27804	7.17872	6.9882	7.32954
15187455	6.23594	6.81614	6.06706	6.07878	6.23988	5.8326
15187458	10.5802	10.659	10.5598	10.6368	10.6161	10.506
15187468	8.86277	9.06904	9.09087	8.66015	8.97808	8.93588
15187474	3.7777	4.01408	3.58398	3.77251	3.65399	3.58037
15187478	4.42501	4.11674	4.2872	3.82096	3.80102	3.82894
15187493	3.39556	3.39089	3.29251	3.36138	3.33409	3.34287
15187496	6.64906	6.59011	6.89371	6.92384	7.16462	7.81094
15187511	3.1814	3.21167	3.29996	3.23987	3.18852	3.23093
15187523	9.77395	9.73558	9.79586	9.69823	9.70054	9.27047
15187535	10.7794	10.7493	10.8441	10.5946	10.5693	10.6134
15187549	6.79864	6.77312	6.80953	6.8965	6.81185	7.15104
15187557	4.14381	4.1578	4.07589	4.0291	3.99087	4.07428
15187560	6.66717	6.61966	6.65136	6.57206	6.38041	6.11129
15187582	3.8679	3.86871	3.66546	3.74893	3.79601	3.68601
15187586	4.2493	4.32278	4.14258	4.28635	4.23719	4.12536
15187591	4.68796	4.45106	4.41737	4.39451	4.34776	4.6128
15187605	8.21845	8.21794	8.45631	8.28349	8.29382	8.12515
15187614	6.81307	6.95957	6.96256	6.94639	7.03705	7.12032
15187629	6.26855	6.20456	6.31787	5.91279	6.11409	5.766
15187653	7.37433	7.30727	7.42153	7.2342	7.43491	7.40963
15187679	4.35564	4.67337	4.23509	3.96334	4.20006	4.1969
15187687	4.80724	5.31532	4.90402	5.8603	5.65147	6.1363
15187703	5.46146	5.4841	5.37726	5.16053	5.11192	4.99548
15187717	5.5128	5.31794	5.91143	5.35121	5.52918	5.29367
15187722	9.52923	9.63071	9.53596	9.40129	9.38614	9.84763
15187736	5.43039	5.29494	5.25921	5.19706	5.13462	5.40174
15187745	10.8899	10.7987	10.8368	10.7435	10.8574	10.8414
15187751	5.72528	5.58282	5.64365	5.70062	5.8731	5.93751
15187770	10.2612	10.3141	10.2999	10.2489	10.268	9.98883
15187799	6.07044	5.9278	5.734	6.82862	6.47774	6.67433
15187821	5.20816	5.13917	5.31451	5.63694	5.43799	5.46667
15187839	6.03186	5.43474	5.80929	5.6341	5.35729	5.09109
15187862	5.51856	5.85083	5.71461	5.71104	5.5626	5.58406
15187875	6.4305	6.47649	6.4297	6.83295	7.04194	7.31447
15187882	4.14611	4.02599	3.99453	3.87759	3.90199	3.89531
15187897	7.73186	7.35638	7.4693	7.69206	7.27178	7.90454
15187901	8.53708	8.46242	8.39452	8.33885	8.41771	8.00295
15187909	10.2555	10.3552	10.238	10.2459	10.2485	10.2135
15187955	5.90906	6.06729	5.61616	5.37253	5.50327	5.55534
15187966	9.05304	9.10737	9.09001	9.12865	9.27956	9.35891
15188005	8.28818	8.45623	8.27655	8.42415	8.37492	8.64201
15188043	4.17906	4.1442	4.25064	4.77357	5.28954	6.25035
15188059	5.15835	5.56964	5.69448	5.9959	5.99722	7.17212
15188077	7.68249	7.87148	7.77952	7.52762	7.79412	7.94294
15188089	8.8372	9.20017	9.04463	9.29693	9.17962	9.2369
15188096	5.45642	5.18673	5.27835	6.1984	6.14317	6.37737
15188124	9.40335	9.65355	9.73247	9.45705	9.72105	9.5011
15188156	6.67903	6.7793	7.09454	7.11434	7.36097	7.91656
15188165	10.4503	10.4519	10.49	10.3402	10.322	10.1127
15188184	7.49887	7.45404	7.80556	7.27096	7.69844	7.63886
15188193	4.5957	4.8364	4.73698	4.61676	4.62823	4.46367
15188196	4.22015	3.98037	4.14863	4.20264	4.08766	4.1409
15188202	6.59731	6.10869	6.5881	6.58039	6.70924	7.01549
15188210	5.85355	5.22388	6.17817	6.5737	6.51374	7.33936
15188225	7.86234	7.48518	7.9611	7.68675	8.07205	8.17603
15188237	9.6578	9.66525	9.73151	9.89271	9.59224	9.5551
15188248	9.01697	9.03356	9.01897	9.30134	9.31218	9.35058
15188255	9.74861	9.79514	9.76914	9.5041	9.77228	9.93637
15188263	4.27235	4.11515	4.39294	4.69484	4.9304	5.26231
15188266	4.74903	5.19228	4.91236	5.25417	5.18465	5.52265
15188276	8.1877	8.25082	8.22628	7.53696	7.9243	8.27541
15188281	10.1772	10.2097	10.2293	10.2574	10.2769	9.97035
15188287	6.14999	5.77042	6.0165	5.95991	5.84884	6.10225
15188291	9.77295	10.0055	9.86453	9.5285	9.6604	10.0002
15188329	7.43756	7.63794	7.84938	7.45451	7.73664	7.40637
15188336	5.42538	5.16269	5.72172	5.98314	6.26242	6.63649
15188353	7.50152	7.37875	7.67318	7.8072	7.68972	8.31221
15188372	6.60626	6.76673	6.63141	6.34992	6.53013	6.17982
15188377	8.57171	8.9798	8.81803	9.03654	9.06213	9.12185
15188389	9.65266	9.52661	9.54216	9.51317	9.4936	9.6212
15188415	6.79946	6.87208	7.0449	6.5004	6.78049	6.50105
15188454	9.15332	9.4838	9.32576	9.4003	9.31337	9.61974
15188460	4.89921	5.04739	4.72444	4.48198	4.64541	4.42269
15188463	10.4116	10.4597	10.433	10.3441	10.3552	10.2348
15188472	6.70053	6.77709	6.9685	6.68399	6.55177	7.3297
15188495	9.7075	9.56511	9.68322	9.56558	9.57248	9.30295
15188508	10.816	11.0213	10.9011	11.1401	11.2332	11.5903
15188525	7.67594	7.67763	7.85427	8.00431	8.61493	8.99305
15188536	5.63517	5.59675	5.63414	5.50994	5.33461	5.38895
15188545	3.51654	3.57086	3.4872	3.49824	3.503	3.39745
15188547	10.7192	10.9135	10.986	10.7858	10.8956	10.8155
15188552	8.4522	8.47304	8.43588	8.75459	8.76528	8.31038
15188576	7.93262	7.7102	7.71825	7.40642	7.58204	7.5281
15188588	8.99345	8.91322	8.95675	8.97999	8.86514	8.95153
15188592	3.84269	3.98945	3.69604	4.32692	4.41985	4.88438
15188596	4.01916	4.17237	4.32097	3.98094	3.90712	4.04862
15188601	4.15369	4.20324	4.04964	3.99899	4.093	4.02121
15188615	4.77975	4.794	4.7143	4.80257	4.68016	4.67459
15188628	3.08973	3.11887	3.00555	3.11955	3.13804	3.10794
15188648	7.62824	7.8029	7.67126	7.56428	7.44952	7.65465
15188657	5.34977	5.92589	5.59369	5.4998	5.56663	5.41941
15188659	3.44838	3.4695	3.54069	3.36651	3.50307	3.39955
15188671	9.23688	9.31007	9.36252	9.01681	9.22929	9.15901
15188677	6.92917	6.79793	6.84606	6.43214	6.66265	6.3627
15188683	4.91721	4.76284	5.50513	4.5165	5.29821	6.22478
15188685	3.81717	3.83747	3.58274	3.64955	3.38643	3.60989
15188688	3.48198	3.44765	4.01377	3.36451	3.477	3.55623
15188690	6.15592	6.19072	6.08248	5.8828	5.98834	5.9333
15188692	3.06842	3.13695	3.28778	3.25732	3.05007	3.05907
15188694	4.5278	4.532	4.71733	4.24378	4.59328	4.59878
15188696	3.14055	3.28544	3.53772	3.3362	3.1253	3.27191
15188700	3.72927	4.34188	4.21067	3.9564	3.82772	3.97367
15188702	3.58566	3.50022	3.46231	3.29368	3.38333	3.48986
15188704	6.31091	6.19382	6.15128	5.93909	5.97373	5.93577
15188706	5.12631	5.13651	5.0196	5.06664	4.85124	5.05052
15188708	5.72346	6.15483	5.59434	5.05954	5.40074	4.68814
15188710	5.91174	5.5187	5.49453	5.14238	5.36769	5.36192
15188712	4.83732	4.86538	4.61792	4.38089	4.61806	4.6426
15188714	6.13389	5.86915	6.23412	5.81217	5.90515	5.74071
15188718	3.6101	3.6324	3.87889	3.5264	3.43704	3.49929
15188722	4.48778	4.23974	4.54932	4.46252	4.15476	3.98533
15188726	3.54055	3.46176	3.38427	3.39697	3.28536	3.49806
15188737	8.0612	7.99818	7.89882	7.96006	7.79134	8.14772
15188747	10.5764	10.5805	10.4576	10.3523	10.2468	10.3646
15188758	5.23004	5.36066	5.1124	5.00038	5.09426	5.19776
15188771	4.18377	3.93953	4.13914	4.37433	4.18866	4.18906
15188774	10.1265	9.87919	9.99255	9.80584	10.1442	9.97949
15188815	10.4937	10.5943	10.5143	10.5129	10.5642	10.4861
15188830	3.82964	3.87624	3.82242	3.72234	3.73846	3.7207
15188847	6.38526	6.30566	6.9809	6.08968	6.27334	6.14053
15188856	5.35865	5.422	5.43525	5.37168	5.12203	5.36802
15188870	6.77505	6.93081	6.88066	7.37945	6.9495	7.49704
15188908	3.77476	3.92306	3.78094	4.0284	3.89787	3.88654
15188913	3.9294	4.35509	3.81684	3.88206	3.91249	3.88892
15188926	8.8844	9.09709	8.88133	9.03218	8.88224	9.32242
15188942	4.53521	4.43496	4.45103	4.45941	4.47605	4.51765
15188950	5.31658	5.42043	5.64416	5.24041	5.16475	4.99081
15188954	4.29195	4.42413	4.44145	4.43067	4.52012	4.61591
15188960	3.66831	3.79309	3.63977	3.71349	3.66186	3.69709
15188979	7.71195	7.88426	7.63094	7.2454	7.6907	7.32285
15189008	9.276	9.1571	9.27372	9.81378	9.61102	9.95884
15189022	9.95611	9.86819	10.0579	9.84147	9.80211	9.69623
15189033	9.75553	9.78945	9.91646	9.44193	9.62288	9.37758
15189036	5.86236	5.97069	6.03623	5.78975	5.88236	5.69345
15189065	5.14371	5.37843	5.05017	5.01396	5.04429	5.25186
15189067	7.86949	7.60905	7.73182	7.73629	7.21341	6.59548
15189083	8.43551	8.35932	8.46973	8.45205	8.46244	8.35372
15189108	8.3354	8.23671	8.3244	8.02394	8.12735	8.026
15189120	6.18992	5.70106	6.54185	6.77784	6.77511	7.74417
15189140	4.90226	4.80269	5.1251	5.37112	5.005	5.15287
15189144	4.09072	4.1719	4.09718	4.21587	4.03866	4.10014
15189168	10.7453	10.8318	10.7483	10.5975	10.5596	11.0421
15189172	10.9714	10.9114	11.0239	11.0536	10.8982	10.8925
15189179	3.85734	3.73008	4.07501	5.19456	3.92295	4.44263
15189195	4.53073	4.30614	4.61074	4.4146	4.25713	4.29263
15189207	6.62358	6.63539	6.71122	6.26632	6.5381	6.53869
15189247	5.37599	5.93725	5.35414	5.24412	5.42372	5.19124
15189250	7.36601	7.40567	7.53753	7.01844	7.37404	7.96223
15189321	7.18293	7.18091	7.10918	8.10154	7.87301	8.16269
15189333	7.90893	8.02946	7.78207	7.60612	7.73407	8.20016
15189350	8.0697	7.81366	8.3368	7.30956	7.30243	7.47744
15189360	9.37293	8.85294	9.04777	9.23572	8.84324	9.0116
15189373	4.87313	4.76709	4.96274	4.60177	4.54293	4.28509
15189384	8.04573	7.67308	7.86596	7.99862	7.54197	7.32555
15189397	5.3813	5.40614	5.24033	4.98817	5.03597	4.99231
15189402	6.03477	5.55426	5.81907	5.8479	5.71965	5.59887
15189421	6.92503	7.11584	7.07186	7.03282	7.18036	7.25464
15189447	8.08743	7.99411	8.12063	7.35801	7.85588	7.82758
15189474	3.33884	3.68715	3.65569	3.69289	3.53927	3.67741
15189491	8.00286	7.75166	8.13171	7.54204	7.68085	7.39266
15189503	7.52498	7.00975	7.40941	7.75613	7.15565	7.28635
15189515	6.218	6.00389	5.94494	6.08328	6.23327	6.18916
15189522	10.0096	10.0861	9.99248	9.89062	10.0027	9.72275
15189534	6.24507	6.12614	6.39987	6.85637	6.48786	6.3182
15189578	5.29072	5.10814	5.33571	5.54749	5.3969	5.73761
15189591	3.81865	3.8481	3.59246	3.71339	3.53876	3.3374
15189593	3.50501	3.68576	3.73984	3.73706	3.74879	3.89903
15189595	4.71032	4.731	4.8227	4.76608	4.73436	4.74051
15189597	4.80087	5.01998	4.99708	4.48272	4.64573	4.53548
15189599	5.76177	6.02395	5.30315	5.14517	5.62039	5.42226
15189603	4.14423	4.8852	4.46935	4.31936	4.30146	4.18976
15189609	6.4587	6.33977	6.70541	6.32314	6.26309	6.67422
15189629	6.95058	7.00776	7.10976	7.14626	7.2635	6.69829
15189635	7.84975	7.86291	7.7955	7.54825	7.80064	7.49848
15189637	10.6207	10.5417	10.5388	10.8401	10.8805	10.3772
15189643	10.899	11.0857	11.0488	10.8689	11.0087	11.0743
15189672	4.73071	4.33024	4.41066	4.38601	4.36875	4.30796
15189692	7.43295	7.8097	7.53297	7.03531	7.26673	7.49167
15189702	5.61797	6.03393	6.2887	6.3651	6.37821	6.77288
15189716	4.26421	4.39483	4.2261	4.0631	4.20033	4.02843
15189737	8.93158	9.00615	8.96826	8.85291	8.84412	8.77278
15189754	7.1027	7.06879	6.88727	6.74	6.57603	6.34333
15189777	6.54858	6.57993	6.73962	6.59318	6.5593	6.66459
15189787	4.54331	4.16464	3.98547	4.15569	3.85592	3.89942
15189789	10.4134	10.4788	10.5734	10.2492	10.4794	10.5614
15189795	5.83529	5.91261	5.81009	6.65048	6.79154	6.75744
15189802	5.47506	5.15943	5.70961	5.27397	5.51397	5.04191
15189813	4.81165	4.79769	5.00101	4.49462	4.54778	4.41927
15189830	6.82953	7.03772	7.2427	7.78801	7.64289	8.41328
15189839	8.73581	8.74828	8.83978	8.63212	8.8754	8.58799
15189844	4.87773	4.85828	4.89504	6.73529	5.14396	5.75692
15189854	6.86832	7.2028	7.17065	7.00829	7.28785	7.37711
15189862	6.07563	6.19431	6.16018	6.39341	6.38358	6.70553
15189876	8.45639	8.55991	8.68729	8.48339	8.55749	8.43108
15189889	3.78532	3.73509	3.7194	3.89779	3.84753	4.22349
15189892	4.15967	4.05754	3.94279	3.87458	3.9621	3.74527
15189931	3.29133	3.138	3.08485	3.10967	3.08168	3.12045
15189947	3.83163	3.86988	3.56248	3.6408	3.48462	3.57646
15189949	3.90358	3.94927	3.87957	4.00401	3.96676	3.87853
15189951	3.33534	3.3493	3.36641	3.31536	3.46094	3.32659
15189955	3.23286	3.3307	3.17392	3.24862	3.25496	3.35717
15189957	3.12259	3.25608	3.19054	3.01776	3.30157	3.1865
15189959	3.74495	3.31156	3.36148	3.33381	3.2405	3.077
15189961	3.22767	3.3982	3.31494	3.3148	3.27089	3.1963
15189963	8.25542	8.60518	8.17526	8.05565	8.353	8.51263
15189970	6.44068	6.14952	6.37911	6.52461	6.77876	7.3473
15189987	3.62061	3.4083	3.52811	3.75721	3.7014	4.42377
15189999	7.35692	7.48316	7.60914	7.23361	6.97629	7.51883
15190009	4.3404	4.39384	4.37334	4.19526	4.50598	4.73732
15190017	5.91693	6.14571	5.85185	5.14797	5.52275	5.718
15190027	5.2206	5.15016	5.71609	5.5823	5.68172	5.84434
15190029	10.4812	10.3907	10.4285	10.1816	10.0279	10.0119
15190038	10.1092	9.93875	9.97985	10.0311	9.78551	9.91799
15190049	4.10541	4.63143	4.29117	4.09851	4.07184	4.09531
15190051	5.96589	5.78102	6.15068	6.57606	6.22103	6.56329
15190085	3.25022	3.29023	3.17265	3.28105	3.2104	3.18531
15190092	8.01148	7.84605	7.91717	7.69803	7.53993	7.50395
15190110	3.5653	3.68473	3.69643	3.58407	3.66383	3.77329
15190115	10.5578	10.4706	10.6828	10.4174	10.5029	10.4322
15190129	7.72038	7.84915	7.33738	8.01927	7.90313	8.23983
15190160	10.2167	10.2617	10.3296	9.97851	10.1976	9.89154
15190165	4.01537	3.96677	4.07039	4.05697	4.0822	3.90914
15190208	7.9409	7.73005	7.82464	7.82786	7.60594	7.54453
15190222	5.08064	5.52822	5.19591	4.8622	4.8303	4.84967
15190257	4.10251	3.96719	3.96989	3.91264	3.73416	3.77833
15190264	5.11143	5.64693	5.20535	4.95994	5.03119	4.93744
15190273	10.0686	10.1138	10.0737	10.1465	10.1404	9.69601
15190287	6.59552	6.56721	6.69959	5.27346	6.00637	6.64622
15190311	6.14849	5.93689	5.94753	5.99632	6.02967	5.7195
15190313	3.62339	3.94049	3.64297	3.63711	3.61394	3.59256
15190322	5.1663	4.95746	5.01327	5.12543	4.84569	5.03978
15190333	6.05318	6.19126	6.18182	6.3125	6.16247	6.22568
15190363	10.3251	10.283	10.3515	10.2903	10.1679	10.3924
15190372	4.75271	4.88333	4.73333	4.86272	4.86188	4.93994
15190396	9.76898	10.0467	9.8538	9.94587	9.72227	9.36588
15190411	10.0287	9.92454	10.1493	9.88098	9.95086	9.64203
15190419	3.89449	3.70693	3.67057	3.86678	3.67041	3.57452
15190433	4.82017	5.09756	4.81342	4.84076	4.75855	4.64181
15190444	4.51724	4.79469	5.05214	4.7916	4.75711	4.74141
15190446	5.15836	5.24993	5.05458	4.94295	5.11351	5.28133
15190448	6.59235	6.78475	6.72867	6.48659	6.54899	6.86377
15190452	6.75197	6.74017	6.65797	6.58153	6.7266	6.73824
15190454	6.01965	5.98705	5.76378	5.72778	5.82651	5.49117
15190456	6.59799	6.4901	6.69901	5.95108	6.24517	6.26194
15190458	7.00507	6.32608	6.96895	6.87834	6.69716	6.82083
15190460	4.57919	4.24949	4.4209	4.09302	4.49499	4.17208
15190467	3.77178	3.69935	3.62943	3.81352	3.65696	3.90049
15190469	4.36251	4.05721	4.09738	4.16296	4.20697	4.20414
15190472	4.28061	4.14466	4.17564	4.04927	4.22358	4.2205
15190474	3.13247	3.05448	3.10768	3.04318	3.04505	3.06727
15190476	3.52557	3.71697	3.45504	3.57922	3.58904	3.63677
15190481	7.78382	7.77702	7.86576	7.85113	7.73798	7.74983
15190483	4.58261	4.77995	4.88827	4.92868	4.99135	5.3834
15190485	5.04146	5.32682	5.09843	5.14074	4.93536	4.93094
15190506	4.75146	4.70713	4.66334	4.60006	4.68759	4.61342
15190526	4.03283	3.80437	4.04608	3.74133	3.78069	3.66478
15190528	4.33678	3.95723	4.04528	4.18225	4.02211	4.52394
15190530	4.9928	5.07414	4.96375	5.12361	5.03034	5.17732
15190541	5.04951	5.31417	5.21693	5.08007	5.21555	5.22087
15190552	7.58903	7.7731	7.60349	7.55609	7.80695	7.53965
15190557	10.527	10.5627	10.6317	10.2838	10.4689	10.5955
15190565	10.0976	9.89815	10.0388	11.2721	10.8112	10.9233
15190577	6.82445	7.08333	7.22753	7.00817	7.05197	7.15145
15190585	6.59715	6.51561	6.60183	6.52725	6.5024	6.41647
15190597	5.22901	5.41095	5.19246	5.08446	5.08634	4.82582
15190650	8.25279	8.04339	8.06556	8.15278	8.38878	7.93562
15190667	4.9019	4.95284	4.94476	4.92641	5.00816	4.64028
15190688	4.32566	4.76416	4.31127	4.3088	4.11521	4.2941
15190721	4.38105	4.24649	4.09265	3.92407	3.89142	3.80321
15190729	9.61874	9.37325	9.40015	9.43618	9.45588	9.10014
15190743	4.66192	4.64197	4.6656	4.43154	4.60348	4.67802
15190749	4.35488	4.04926	3.85225	4.27404	4.26287	3.91065
15190751	5.80996	5.55237	5.37509	5.35832	5.46061	5.11093
15190767	6.1099	6.34815	5.90525	5.94764	5.71228	6.08102
15190771	9.88428	9.73651	9.88863	9.62667	9.29569	9.08736
15190783	6.54467	6.07767	6.26202	6.54608	5.64134	5.75416
15190788	4.8757	5.09688	5.01247	4.8214	4.7996	4.69014
15190797	4.44204	4.78658	4.30939	5.57318	4.82564	5.10784
15190807	5.21372	5.42641	5.69879	4.83566	4.8806	4.84744
15190813	8.72842	7.67334	7.68553	8.18634	7.32831	7.197
15190815	4.68194	4.96093	4.59733	4.58263	4.47387	4.36503
15190832	7.01412	6.67192	6.965	6.68903	7.02841	6.67687
15190838	7.35178	7.32116	7.38921	7.23177	7.36545	7.16624
15190850	6.31567	6.6107	6.57315	6.24148	6.25217	6.00016
15190857	7.49072	8.08033	8.19679	7.68943	8.15182	7.52095
15190866	8.84504	8.9746	8.87035	9.05802	8.93156	8.77321
15190879	8.36243	8.28537	8.38955	8.75171	8.29365	8.05629
15190900	8.18755	7.64964	7.98676	8.25191	7.96486	8.00728
15190948	10.7634	10.8095	10.5855	10.6376	10.7705	10.7766
15190956	5.88274	6.05091	5.81079	6.05142	6.33117	6.06046
15190986	7.17171	6.75717	6.82924	7.02895	6.91888	7.00391
15190996	5.95358	5.95843	5.88738	6.21282	6.24558	5.78421
15191000	7.12969	6.62708	6.7922	6.90406	6.47733	6.12215
15191003	4.93676	4.924	4.91825	5.2508	4.78367	4.64235
15191014	8.21564	8.08374	8.26239	8.24365	8.17288	8.11218
15191053	5.81667	5.999	5.74161	5.65342	5.538	5.30587
15191069	6.13186	6.08424	6.20224	6.26531	6.44143	5.98146
15191090	7.09913	6.93709	7.06628	7.17862	7.01889	6.7397
15191097	6.75154	6.65582	6.75577	6.38109	6.75652	6.41519
15191135	9.64217	9.62568	9.8687	9.48342	9.69928	9.14525
15191141	6.48007	6.54839	6.63038	6.22944	6.25889	6.06273
15191150	4.69323	4.77293	4.60696	4.51572	4.51896	4.40129
15191219	4.57498	4.75166	4.59553	4.25109	4.38846	4.33437
15191231	5.54777	6.00024	6.116	6.11954	6.61773	6.65143
15191247	5.10721	4.85935	4.76951	4.7406	4.75869	4.37228
15191253	7.00655	6.40665	6.66301	6.95854	6.73538	6.33072
15191262	5.27496	5.15564	5.06684	4.87024	4.97123	4.91091
15191264	4.74362	4.78641	4.45536	4.82556	4.61233	4.56365
15191272	4.99617	5.48842	5.39177	5.2767	5.28862	5.22173
15191288	10.8619	10.4836	10.7854	10.8363	10.5615	10.642
15191312	8.5873	8.43523	8.53209	8.08068	8.33064	7.89704
15191326	6.31142	6.08581	5.95592	6.26383	5.8944	5.92458
15191334	6.62517	6.35017	6.47085	7.14487	6.74157	6.77103
15191354	8.52709	7.99453	8.13611	8.09409	7.57444	7.20117
15191359	5.58523	5.36329	5.4343	5.23383	5.28696	5.10008
15191367	5.09464	4.69592	4.99048	4.72245	4.40592	4.82316
15191371	5.95361	5.45026	5.49521	6.06118	5.72248	5.51522
15191377	4.60821	4.70524	4.27422	4.34207	4.34804	4.66432
15191380	6.63361	6.53947	6.5676	6.40968	6.56879	6.31103
15191383	8.98637	8.7111	8.68875	8.67661	8.46352	8.19393
15191387	8.44171	8.62656	8.93953	7.9009	8.23937	7.81698
15191391	6.84667	6.43968	6.08939	5.62729	5.61566	5.34597
15191398	5.03348	5.10049	5.02926	5.00682	4.82833	4.91855
15191420	4.91877	5.17895	5.17611	4.99294	5.02787	4.86322
15191462	9.3796	9.38626	9.49297	9.61613	9.30109	9.38827
15191470	4.48859	4.61707	4.50745	4.58173	4.46828	4.51669
15191491	3.51422	3.49649	3.5057	3.60037	3.45081	3.39466
15191495	4.86477	4.79355	4.81191	4.62042	4.6023	4.60692
15191506	4.12963	4.15716	4.05451	4.07637	4.17114	4.11739
15191510	6.82082	6.69766	6.80196	6.70518	6.77697	6.56412
15191520	4.20538	4.38433	4.30156	4.31901	4.13536	4.76457
15191526	6.93182	7.14065	7.03416	6.91422	7.2625	6.90537
15191530	6.1192	6.03446	6.32817	5.54197	5.98571	5.93779
15191538	8.91283	8.82954	8.99436	8.80705	8.51961	8.74316
15191543	6.80095	6.9076	7.11866	6.8988	7.01951	6.66064
15191548	6.29732	6.19566	5.91731	6.14361	5.82485	5.76676
15191555	3.70506	3.82628	3.68048	3.8032	3.87525	3.96425
15191603	7.52699	7.29361	7.23092	7.3774	7.35015	7.39839
15191615	3.90657	4.20736	4.03877	3.57096	3.78773	4.1883
15191622	3.20709	3.27922	3.23742	3.18613	3.12716	3.3512
15191624	3.65431	3.63945	3.54635	3.35796	3.41415	3.54815
15191626	3.26651	3.3866	3.3429	3.3085	3.17731	3.5034
15191628	3.60993	3.67465	3.43839	3.45031	3.46263	3.48652
15191630	3.02805	3.24919	3.01521	3.13069	3.2756	3.12217
15191632	3.4174	3.12669	3.19983	3.02884	3.10244	3.29215
15191634	3.19479	3.23	3.21656	3.0871	3.04258	3.16594
15191636	3.21981	3.39624	3.43405	3.24442	3.23152	3.17179
15191643	2.85393	2.84288	2.88287	2.92324	2.91314	2.90031
15191647	3.15329	3.12043	3.01615	3.09599	3.00953	3.06157
15191663	3.51015	3.32222	3.4221	3.49762	3.32574	3.33365
15191677	5.93489	5.69744	5.8158	5.80258	5.74134	5.84815
15191691	4.56165	4.64551	4.55359	4.36857	4.20327	4.24066
15191697	5.54078	5.83739	5.3672	5.37082	5.27776	5.32447
15191704	4.7168	5.61796	5.18281	4.84472	4.92354	4.74266
15191715	6.17443	6.27967	6.0701	6.04995	6.12443	5.78019
15191724	5.31143	5.42952	5.26292	5.16922	5.25101	5.34611
15191732	7.69142	7.35002	7.75131	7.30883	7.54787	7.12875
15191742	4.49604	4.3183	3.9151	4.18093	4.16484	4.10813
15191748	5.34408	5.48226	5.60262	5.22868	5.31404	5.09626
15191750	5.40212	5.4523	5.1417	5.13013	4.91192	5.03567
15191760	5.68648	5.37944	5.65241	5.62443	6.08043	5.96853
15191764	5.16894	5.39015	5.02614	4.92683	4.95035	5.06148
15191786	4.95945	5.03722	4.56446	4.88292	5.0164	5.05595
15191798	3.45127	3.12735	3.35379	3.30563	3.43789	3.39432
15191800	7.68007	7.86762	8.12775	7.72254	7.77557	8.06751
15191802	3.49386	3.37168	3.38684	3.40401	3.29745	3.32015
15191809	5.27981	5.19386	5.29832	5.49676	5.50886	5.72805
15191838	4.67671	4.57133	4.4552	4.93709	4.52659	4.01524
15191849	6.24839	6.31111	6.1425	6.1057	6.21083	5.9317
15191861	8.55805	8.34103	8.66258	8.25782	8.37329	7.99531
15191870	3.85814	4.01081	3.811	3.94431	3.85259	3.82683
15191877	9.71715	9.53228	9.71182	9.90636	9.91573	9.82921
15191888	4.99113	4.77714	5.11465	4.53757	4.46803	4.43033
15191905	8.79136	8.81125	8.76904	8.59368	8.65995	8.39494
15191923	11.1891	11.1475	11.1914	11.2177	11.1838	11.2529
15191931	9.01194	9.07008	9.04352	8.95567	9.11858	8.96842
15191941	3.7562	3.78771	3.73215	3.65468	3.65793	3.70929
15191953	5.00678	4.77421	4.99171	4.8448	4.88319	4.63602
15191998	4.64854	4.88936	4.38041	4.46903	4.4896	4.22816
15192000	7.93574	7.92146	8.03298	8.1668	7.87269	7.6785
15192019	9.41508	9.21796	9.34803	8.85843	9.11101	8.9492
15192024	5.6494	5.16687	5.63381	6.29981	6.25047	6.72529
15192034	10.805	10.8112	10.9593	10.6851	10.8097	10.6676
15192043	5.77174	5.40821	5.95715	5.98605	5.46252	5.55085
15192066	10.7942	10.6955	10.7234	10.1938	10.3972	10.2981
15192072	10.6894	11.0283	11.0441	10.7091	11.1021	10.6874
15192079	8.09097	7.81504	7.88986	7.67264	7.60672	7.46467
15192096	7.74691	7.50068	7.62548	7.61642	7.69292	7.27451
15192101	8.78107	8.73754	8.78399	8.65805	8.78018	8.78935
15192109	4.88545	5.01609	5.06632	5.17304	5.4574	5.14638
15192123	5.25285	5.21486	5.24108	5.05659	5.13349	4.91627
15192130	4.32972	4.2514	4.3813	4.08355	4.03778	4.01085
15192164	3.95329	4.08164	3.92913	3.68023	3.69057	3.87503
15192173	4.72683	4.57657	4.50154	4.47525	4.56539	4.61988
15192184	6.38371	6.19296	6.46126	6.31234	6.55761	6.26752
15192194	6.31743	6.40007	6.85618	7.47718	7.19543	7.39303
15192204	3.69176	3.46278	3.5444	3.66493	3.46605	3.40301
15192216	4.64359	4.47051	4.75887	4.44905	4.58477	4.4056
15192224	6.9297	6.66287	7.21194	6.75059	7.00452	6.84081
15192233	8.3514	8.29199	8.39322	8.59037	8.43916	8.73674
15192238	9.88699	9.95606	10.0003	9.92156	9.75775	10.0818
15192248	3.8754	3.819	3.81771	3.66746	3.93681	3.52712
15192250	8.0404	8.04272	8.0572	7.88081	7.85709	8.22719
15192284	4.07871	4.21643	4.4585	4.31316	4.1954	4.33945
15192287	6.69352	6.72664	7.08709	6.80823	6.90356	7.36255
15192330	6.30769	6.5199	6.4925	6.426	6.55842	6.59968
15192332	4.5654	4.8631	5.23451	5.07018	4.94966	5.07959
15192356	6.47751	6.4401	6.54873	6.0214	6.54604	6.65686
15192369	4.56201	4.80107	4.4804	4.81392	4.79673	4.97833
15192405	4.32158	4.84082	4.44023	4.43614	4.35179	4.45052
15192409	7.39717	7.33879	7.48506	7.20236	7.05584	7.18279
15192413	3.66507	3.81856	3.76554	3.81658	3.74562	3.79874
15192434	4.46318	4.14254	4.55002	4.18187	4.30785	4.46742
15192445	6.44012	6.22477	6.33727	6.33862	6.12748	6.12866
15192465	4.95706	4.76615	4.62942	6.5426	4.94719	4.9353
15192473	3.81368	3.97413	3.72383	3.78002	3.7847	3.83232
15192481	3.84164	3.82198	3.68033	3.88962	3.82331	3.78001
15192487	8.2757	8.37386	8.56187	8.31995	8.80046	8.48466
15192539	3.57627	3.45792	3.3751	3.49921	3.38466	3.289
15192555	10.3421	10.4637	10.4534	11.2708	11.0719	11.1237
15192567	3.29359	3.42365	3.19421	3.36371	3.14901	3.27191
15192569	3.31788	3.44519	3.33652	3.37485	3.35184	3.32208
15192571	7.61263	7.5887	7.82535	7.94832	7.3631	7.81073
15192592	8.14291	8.38204	8.39002	8.54567	8.46748	8.79522
15192618	4.04707	3.97227	3.89987	5.00549	4.63497	5.1613
15192620	3.70128	3.7739	3.65579	3.69698	3.67147	3.69576
15192623	3.5484	3.88912	3.83085	3.89356	3.955	3.93049
15192655	10.9829	11.0591	11.0413	10.8074	10.9022	10.9461
15192693	4.73453	4.54329	4.57968	4.53563	4.38448	4.79425
15192695	3.32052	3.43703	3.05703	3.2623	3.32108	3.006
15192700	4.0122	4.10665	4.09631	3.83412	3.81108	3.79289
15192714	9.26335	9.28211	9.11321	9.14225	9.03051	9.15114
15192720	6.17995	6.10554	6.58383	6.0126	6.46586	6.55004
15192734	5.28877	5.39565	5.30697	5.84555	5.55432	6.00099
15192740	6.89926	6.76786	7.13116	7.05418	7.30509	8.08853
15192756	10.3882	10.4699	10.6103	10.6042	10.6315	10.5435
15192762	3.76117	3.56982	3.44247	3.46494	3.58184	3.51889
15192777	6.48662	6.57619	6.72261	6.26077	6.68167	6.18422
15192783	4.95621	5.00129	5.23914	4.92505	5.13578	4.99839
15192792	3.60787	3.59921	3.67507	3.52641	3.38633	3.48896
15192813	10.4932	10.5871	10.4428	10.401	10.4526	10.5088
15192818	3.12496	3.07153	3.07519	3.30034	3.15065	3.3049
15192821	4.91775	4.708	4.89892	4.86273	4.70901	4.72444
15192828	8.70099	8.70208	9.02797	8.4515	8.95247	8.84816
15192852	6.2976	6.04524	5.94023	5.69709	5.34771	5.12367
15192856	3.71192	3.89266	3.61946	3.60715	3.61622	3.47487
15192882	4.65525	4.79116	5.17314	5.15712	5.55662	6.44026
15192916	3.14014	3.25135	3.16614	3.12047	3.14685	3.13944
15192938	7.76832	7.83685	7.91596	8.02518	8.157	8.21371
15192955	3.72246	3.522	3.58482	3.4136	3.38449	3.39465
15192977	9.77818	9.74083	9.7763	9.7888	9.96314	9.48896
15192986	4.44767	4.36407	4.2776	4.6034	4.42869	4.25657
15192996	11.126	11.0965	11.2577	10.9166	11.0598	10.7491
15193000	11.0679	10.8899	11.0879	11.3584	11.2086	10.9067
15193004	9.25939	9.21071	9.21273	9.02379	9.37306	9.40851
15193021	7.02555	7.08279	7.05358	6.72066	7.01616	7.21621
15193048	9.05304	8.91936	8.81056	8.59169	8.50919	8.37152
15193057	6.80519	7.00739	6.86158	7.4794	7.56878	8.0935
15193083	9.19148	9.28687	9.23188	9.3313	9.19243	9.44928
15193100	3.81547	4.08832	3.75546	3.65726	3.73114	3.55863
15193104	3.58211	3.49437	3.52451	3.42113	3.46673	3.48058
15193121	11.6277	11.4458	11.5384	11.4449	11.4499	11.4524
15193127	4.54793	4.42444	4.5867	4.40615	4.53144	4.39191
15193141	7.43896	7.3415	7.39857	7.21212	7.56602	7.23605
15193147	10.9557	10.9651	10.9516	10.9636	10.9698	10.8529
15193211	5.97319	5.8129	5.73616	5.30976	5.38263	5.07901
15193224	6.1173	5.49483	5.85092	5.88134	5.90879	5.79664
15193226	7.52088	7.52756	7.6977	7.44823	7.7306	7.87248
15193247	6.42531	6.475	6.56704	6.06828	6.28536	5.90148
15193267	7.39065	7.57053	7.45399	7.245	7.38918	7.60644
15193271	8.685	8.80555	8.75236	8.61817	8.78685	8.76719
15193275	10.1955	10.4474	10.3195	10.0746	10.274	10.3565
15193296	7.88902	7.90483	8.04573	7.91362	7.86922	8.08328
15193312	8.33532	8.25525	8.43838	9.04273	8.94103	9.23548
15193317	8.52645	8.70786	8.74184	8.67519	8.79306	8.82094
15193322	10.6024	10.6849	10.586	10.4356	10.4858	10.5193
15193340	5.30905	5.48931	5.82118	6.2394	5.87612	6.628
15193351	3.63248	3.91729	3.71558	3.41682	3.59104	3.60623
15193357	4.67498	4.87704	4.71198	4.52342	4.58793	4.44559
15193369	7.29677	7.31523	7.54245	7.3276	7.49077	7.83174
15193391	6.45488	6.50387	6.85531	6.47381	6.86917	7.37827
15193404	5.00395	4.83291	4.97523	5.06517	4.87756	4.71157
15193414	4.92647	5.0911	5.36784	5.03633	4.98882	4.83909
15193421	10.261	10.2432	10.3177	9.83114	9.95541	9.92541
15193446	6.79788	6.93947	7.32286	7.14643	7.20678	6.93855
15193476	8.60135	8.46077	8.50603	8.71903	8.58289	9.13167
15193518	4.08441	3.93975	3.68198	3.70294	3.76396	3.74945
15193529	7.98371	8.23831	8.40006	7.94987	8.0963	8.29406
15193553	7.60185	7.26243	7.11837	8.48856	8.25082	7.88744
15193586	5.14406	4.99477	4.94017	4.96401	5.03359	4.93691
15193591	4.56729	4.76179	5.02159	5.07782	4.84693	5.33843
15193600	9.22967	9.31714	9.28991	8.94355	9.23795	9.3099
15193612	4.08379	4.2578	4.04966	3.96276	4.06574	4.17728
15193641	3.70576	3.82129	3.8084	3.64007	3.87686	3.67222
15193662	3.67838	3.66363	3.5597	3.67176	3.54286	3.69855
15193665	3.69685	3.91303	3.52119	3.40235	3.45375	3.55683
15193674	4.37265	4.50603	4.27433	4.19345	4.24614	4.19626
15193678	5.26587	5.25028	5.33972	5.45498	5.46182	5.63593
15193680	9.38907	9.48452	9.48405	9.51523	9.40743	9.2926
15193691	3.38203	3.49045	3.35897	3.4432	3.45721	3.27603
15193697	3.88092	3.8631	3.91013	3.80219	3.80949	3.78416
15193709	4.21024	4.11937	4.21468	3.89989	3.99077	3.80468
15193736	8.95415	9.01336	8.99255	9.31746	8.7956	8.88674
15193740	9.78662	9.8931	9.9431	9.81303	9.86612	9.90124
15193774	5.2981	5.10475	5.10936	5.40049	5.27494	5.37039
15193790	6.09293	5.8812	6.00731	6.26989	6.33416	6.42216
15193795	9.91687	10.1538	10.0624	9.72465	9.8686	10.1883
15193824	8.54174	8.82685	8.68194	8.41672	8.53968	8.82446
15193889	4.45276	4.62641	4.78684	4.71595	4.45472	4.65489
15193923	6.87189	6.93078	7.01126	7.02219	7.01488	7.34776
15193957	3.84256	3.96588	3.7267	3.52923	3.61459	4.18985
15193966	8.12867	8.35466	8.2356	8.29119	8.60911	8.36893
15193981	4.03583	4.27724	4.10158	4.10609	3.9721	3.9145
15194009	9.6493	9.86184	9.90563	10.3999	10.5197	10.9112
15194015	3.91676	3.73691	3.70281	3.48713	3.63303	3.57813
15194025	4.96048	5.4431	5.32382	5.5958	5.90808	6.09862
15194036	8.96928	8.97796	9.18112	8.89816	8.8972	8.57578
15194069	5.40883	5.06482	5.25395	5.06223	5.00807	5.10955
15194087	7.68281	7.72385	7.62326	7.59382	7.60651	7.18647
15194111	7.77926	7.57274	7.72446	7.77451	7.63264	7.83078
15194120	3.45304	3.42278	3.26918	3.41962	3.36343	3.42998
15194129	4.57517	5.12129	4.56606	4.49411	4.5721	4.49862
15194132	3.40773	3.49622	3.41924	3.48586	3.46599	3.59654
15194143	5.73825	5.88127	5.70381	6.77405	6.4139	6.90781
15194165	9.80901	9.76063	9.86296	9.69073	9.70961	9.87848
15194174	5.27111	5.2941	5.60682	5.74128	5.71948	6.09867
15194192	5.20147	5.14889	5.37386	5.2816	5.131	5.34223
15194202	4.93624	5.31463	4.93733	4.83248	4.86768	4.71217
15194220	4.35105	4.63826	4.30769	4.25545	4.39383	4.36141
15194227	7.18474	7.27444	7.29575	7.71368	7.61415	7.87932
15194253	7.44908	7.13876	7.31759	7.55962	7.19869	7.38744
15194273	8.33927	8.37996	8.30204	8.16226	8.06461	8.15878
15194286	7.57571	7.68919	7.7821	7.6765	7.73362	7.72237
15194363	8.62729	8.54422	8.58912	8.41683	8.41436	8.31919
15194373	5.33987	5.69118	5.89074	6.16094	6.66245	6.64955
15194398	10.4617	10.5095	10.5159	10.2607	10.4535	10.3535
15194409	10.3938	10.3247	10.3315	10.3765	9.93901	10.1667
15194445	3.72027	3.64703	3.61744	3.48059	3.60468	3.55948
15194459	4.29003	3.957	4.00754	3.90053	3.8181	3.6444
15194527	6.9779	7.2357	7.16625	7.0048	7.29717	7.14222
15194542	4.12683	4.03635	4.1723	4.97631	4.77045	6.06533
15194555	3.86913	3.99994	3.90879	3.6413	3.94255	3.97105
15194595	9.44362	9.47917	9.5405	9.45284	9.43514	9.67808
15194599	7.41954	7.81174	7.62177	7.13052	7.37367	7.683
15194607	8.46602	8.48684	8.46295	8.27109	8.19512	7.93513
15194617	7.27338	7.52203	7.5126	6.75632	6.86561	7.13834
15194630	5.01633	5.00759	4.78876	4.94882	4.96964	5.05199
15194640	6.81409	6.90217	6.62254	6.70778	6.61652	7.22102
15194662	9.32089	9.39856	9.29269	8.59381	9.2203	9.40942
15194689	6.7189	6.68652	6.7822	6.65629	6.70408	6.98086
15194700	8.56889	8.69203	8.72297	8.74327	8.7662	8.70193
15194711	6.4895	6.71574	6.31816	6.21385	6.25017	6.09576
15194713	3.89626	3.91662	3.78336	3.55302	3.59376	3.56543
15194736	3.18359	3.15491	3.14294	3.1018	3.12738	3.22345
15194738	4.05739	3.94908	3.83328	3.95522	3.82351	4.06552
15194788	4.29021	4.21375	4.26001	4.58347	4.62752	5.12578
15194797	3.8863	4.02303	3.72522	3.90783	3.90396	4.02755
15194811	4.53861	4.54969	4.57852	4.63952	4.4724	4.41322
15194830	4.52868	4.7693	4.66355	4.44241	4.56678	4.53665
15194841	5.38476	5.59683	5.43846	6.23275	6.28203	6.61852
15194851	6.34116	6.2896	6.20104	6.11727	6.09368	6.26933
15194858	3.91411	3.92271	3.89921	3.73787	3.91734	3.70613
15194882	10.4781	10.5052	10.6432	10.4055	10.5397	10.2162
15194905	7.54416	7.79793	7.68339	7.421	7.60827	7.85876
15194917	5.7341	6.16881	5.77951	5.98801	6.18165	5.99771
15194925	10.4994	10.563	10.5205	10.6237	10.7031	10.8204
15194941	8.4033	8.45386	8.7092	8.02496	8.31364	8.11941
15194981	6.78127	6.67588	6.97583	7.76742	7.13291	7.13252
15195016	5.80686	5.87203	5.99497	5.61313	6.12517	5.80233
15195046	10.5211	10.6478	10.5243	10.5143	10.4461	10.4059
15195055	4.06484	3.95699	3.92787	3.91925	3.8962	3.9351
15195102	4.54692	4.70011	4.60811	4.56461	4.48597	4.52143
15195130	7.42979	7.28536	7.3834	7.59297	7.49742	7.73416
15195152	5.14868	5.20222	5.16211	5.33791	5.47255	5.30138
15195171	4.46515	4.45118	4.33902	4.17045	4.04182	4.11244
15195179	7.51346	8.04857	7.95164	8.05577	8.36442	8.28445
15195218	9.48134	9.14736	9.46232	8.98426	9.22975	8.6713
15195222	5.06271	5.03871	5.20686	5.28688	5.39638	4.80848
15195238	8.19997	7.636	7.90276	7.68709	7.77424	7.76662
15195244	6.64733	6.12848	6.56361	6.26324	5.84064	5.71387
15195254	6.96847	7.08736	7.22615	6.98051	7.05132	6.61591
15195268	4.7843	4.49094	4.56544	4.59817	4.69189	4.61742
15195279	8.71304	8.86356	8.7687	8.25809	8.5837	8.91605
15195282	6.70286	6.95309	6.90676	7.38483	7.56892	7.60592
15195284	4.7314	4.73482	4.91607	4.82865	4.35855	4.67218
15195291	7.16114	7.17193	7.30984	7.97945	7.72913	7.56299
15195304	9.4241	9.47678	9.56745	9.53708	9.52434	9.18349
15195314	6.6068	6.36693	6.22163	6.1407	6.02901	5.79385
15195340	9.43115	9.3972	9.35917	9.33582	9.35931	9.40736
15195370	9.71529	9.23422	9.38592	9.28155	8.90642	8.92989
15195391	4.59404	4.27451	4.51964	4.43558	4.36523	4.74759
15195399	8.6833	8.38114	8.67599	8.34754	8.41371	8.65028
15195405	3.21218	3.41979	3.567	3.40203	3.28937	3.27805
15195419	6.87737	6.78327	6.70145	6.22413	6.3294	6.5731
15195445	9.46205	9.38866	9.56548	9.22989	9.18589	9.26388
15195465	4.49022	4.46973	4.43802	4.22444	4.34563	4.32803
15195468	8.95775	8.74709	8.9115	9.34666	8.97002	9.22895
15195499	6.16287	6.24003	6.60045	6.24151	6.3065	6.2551
15195513	8.71493	9.04907	8.91048	8.85556	8.91538	9.14948
15195523	4.2374	4.4002	4.2309	4.31038	4.2049	4.15692
15195533	8.78462	8.36748	8.35692	9.20609	8.57535	8.89665
15195537	7.06551	7.22056	7.41891	7.44899	7.62238	7.21317
15195549	4.01751	3.8071	3.90545	3.74783	3.89836	3.64579
15195581	4.18089	4.05082	4.25388	3.90029	3.95698	3.99827
15195583	4.51672	4.34775	4.56457	4.34731	4.43018	4.27594
15195592	7.49196	7.45314	7.48583	7.29684	7.4686	7.24288
15195606	3.96134	3.97655	3.81699	3.65174	4.09083	3.97538
15195662	3.94435	4.09865	3.88022	4.31468	3.92062	4.02779
15195679	5.48562	5.16573	5.15753	4.90829	4.77711	4.62081
15195702	7.62162	7.74046	8.13068	7.80719	7.86444	7.91465
15195715	7.2259	6.98128	7.07605	7.53487	7.47021	7.53371
15195717	7.42751	7.42279	7.65316	7.11721	7.56883	7.54501
15195730	6.80209	6.72662	7.03739	6.60657	6.80623	7.0535
15195751	3.90848	4.03028	3.81576	3.52529	3.60369	3.73112
15195758	3.70905	3.79901	3.51894	3.5906	3.57011	3.61445
15195767	3.5036	3.48256	3.44105	3.35848	3.38648	3.34683
15195775	3.55974	3.62033	3.42076	3.52233	3.44259	3.75222
15195793	4.21886	4.16584	4.22897	4.05046	4.16737	4.08935
15195800	4.58436	4.65466	4.5178	4.58399	4.73049	4.37138
15195819	4.9671	5.17805	4.99246	4.88522	5.04647	4.79182
15195831	5.64278	5.82392	5.79366	6.26231	6.00136	6.79787
15195879	5.6175	5.66091	5.52642	5.33324	5.35637	5.60456
15195881	3.65913	3.78469	3.60531	3.60377	3.56106	3.52735
15195892	4.21211	4.248	4.14426	4.13289	3.94106	3.87966
15195899	3.92861	3.85324	4.01599	3.8727	3.76564	3.80469
15195901	8.41093	8.31243	8.37731	8.57611	8.26508	8.13938
15195912	3.3054	3.24421	3.23488	3.24516	3.04365	3.14968
15195929	9.40824	9.28721	9.38935	9.04471	9.23878	8.56765
15195935	8.59152	8.41413	8.62393	8.35453	8.4085	8.19153
15195966	5.68356	5.57657	5.6816	5.70216	5.6341	5.85722
15195978	6.29944	6.75444	6.71518	6.62477	6.67366	7.21737
15196000	10.8236	10.8643	10.7814	10.6696	10.7091	10.8437
15196042	4.90888	4.55079	5.35151	4.93452	5.23359	4.81449
15196051	10.1528	10.2844	9.99842	10.1389	10.2762	10.4903
15196062	5.04773	4.80233	4.63835	4.52568	4.80533	4.77261
15196066	10.0792	10.1143	10.4719	10.4665	10.6163	10.7642
15196088	4.72096	4.71958	4.49829	4.48749	4.5103	4.37869
15196104	7.74387	7.81072	8.04676	8.00749	7.84887	7.69463
15196112	9.63839	9.77689	9.98455	9.63026	9.62092	9.31308
15196118	9.1977	9.36403	9.35802	9.62264	9.43598	9.62999
15196122	8.44855	8.22297	8.37293	8.1423	8.18419	7.81573
15196161	5.20385	5.77913	5.75202	5.52264	5.76808	5.92164
15196200	4.17015	4.23147	3.93115	4.2216	3.99353	4.00178
15196205	6.89452	6.85149	7.06128	6.66736	6.80852	7.24926
15196231	6.10846	6.16326	6.43383	5.27977	5.53157	5.50584
15196257	9.08952	9.05608	9.12834	9.07678	9.03061	9.28964
15196272	3.76881	3.6813	3.6964	3.67493	3.62677	3.6374
15196279	6.37504	6.64502	6.50002	6.24758	6.54702	7.45684
15196284	6.94847	7.10758	7.35708	7.40017	7.76715	7.8125
15196289	7.22254	7.48548	7.25697	7.35264	7.40424	7.75866
15196315	4.52254	4.15574	4.47443	4.83892	4.56207	4.40793
15196317	5.10828	5.16408	5.42942	6.21737	5.87233	6.55041
15196328	5.26945	5.15842	5.53713	6.0817	5.86368	6.02205
15196332	7.7879	7.65759	8.10091	8.17612	8.30185	8.05367
15196334	5.25077	5.60663	5.02774	5.15253	5.08788	4.83937
15196336	8.7488	8.83818	8.79915	8.78121	8.7377	9.03738
15196356	8.42096	8.41702	8.32428	8.49412	8.44078	8.7549
15196385	9.87869	9.87441	10.0935	9.89284	9.67932	10.1035
15196407	3.71447	3.71478	3.76852	3.73023	3.82739	4.08151
15196418	6.74184	6.85638	6.76214	6.58874	6.90954	6.62834
15196434	8.3393	8.26699	8.37898	8.24092	8.17548	8.29085
15196442	7.80977	7.9582	7.9879	7.78629	7.70304	7.97196
15196494	4.60288	4.71015	4.68348	4.39518	4.35543	4.20087
15196505	9.61675	9.57322	9.58989	9.46069	9.43844	9.28856
15196534	6.33779	6.29738	6.38752	6.34461	6.702	7.3276
15196550	7.2262	7.40628	7.27877	6.93024	7.36776	7.5227
15196569	11.0598	11.0405	11.0948	10.9976	11.0266	11.1068
15196583	6.78029	7.12721	7.06599	6.76742	6.85056	6.65105
15196592	9.84855	9.96223	9.88389	9.41009	9.74109	9.89473
15196616	10.234	10.2742	10.2839	10.3049	10.3042	10.5295
15196636	8.3254	8.53249	8.68859	8.35038	8.64805	8.37542
15196647	6.72042	6.38898	6.66562	6.43316	6.57953	6.59172
15196653	11.35	11.4428	11.6272	11.2813	11.358	11.2347
15196657	7.35788	7.31597	7.55641	7.20208	7.20441	7.58399
15196661	8.72248	9.12217	8.86607	8.51391	8.84617	9.09504
15196670	3.62987	3.69714	3.65758	3.67039	3.69367	3.6702
15196677	4.78461	4.84314	4.76173	4.72459	4.73566	4.64498
15196692	3.14038	3.29903	3.13189	3.05816	3.17191	3.31095
15196726	6.62929	7.11433	6.52616	6.49341	6.52428	6.38921
15196728	3.51396	3.47964	3.56727	3.50477	3.46086	3.62331
15196736	6.10739	6.06694	5.82209	5.8224	6.33066	6.19701
15196744	5.08164	4.85167	5.02251	4.91412	4.91899	5.36053
15196762	5.26808	5.38352	5.19774	4.96378	5.2163	5.04549
15196765	3.8423	3.73858	3.64871	3.81592	3.75978	3.83155
15196774	5.79417	5.65659	5.67821	5.63011	5.76559	5.3343
15196776	10.6635	10.6428	10.593	10.216	10.4277	10.1494
15196778	5.80559	5.6124	5.81948	5.24537	5.12717	4.88187
15196787	7.56053	7.83645	7.84842	7.55209	7.80351	7.67527
15196917	5.61409	5.5416	5.5723	5.33779	5.95727	5.87773
15196945	7.69896	7.9685	7.89218	7.90043	7.77788	7.84338
15196970	5.57239	5.67776	5.6515	5.92486	5.91019	6.25897
15196990	3.89311	4.20838	4.10654	3.86663	4.04427	3.87023
15196993	4.74256	4.90174	4.45863	4.15215	4.21386	4.39485
15196999	7.37074	7.31134	7.55073	6.98687	7.41138	7.31374
15197008	2.95205	2.98705	2.93339	2.87624	3.01809	3.00163
15197016	5.49692	5.43267	5.34045	5.23402	5.2842	5.39601
15197030	3.15697	3.18334	3.07106	3.00679	3.07092	3.10072
15197032	4.66836	4.66372	4.7473	4.73861	4.93106	4.98069
15197039	10.1193	10.0601	10.1261	10.0391	10.03	10.3653
15197088	9.0711	8.95536	9.0553	8.51343	8.74399	8.65345
15197098	5.72373	5.73888	5.72912	5.76986	5.94484	6.56777
15197120	5.52327	5.48799	5.40908	5.40804	5.36986	5.38394
15197146	9.10065	9.07188	8.97101	9.17946	9.12436	9.07987
15197156	6.70242	6.58625	6.59243	6.71748	6.73983	7.45996
15197163	3.35902	3.436	3.46318	3.39582	3.38763	3.31108
15197175	6.28646	6.29858	6.42625	6.00633	6.12793	6.46015
15197201	6.5732	6.75819	6.93098	6.78324	7.13274	7.1818
15197213	6.76057	6.94846	7.05644	7.06484	7.06056	7.19496
15197222	5.28376	5.18364	5.25534	5.24224	5.26932	4.99217
15197245	3.9294	4.35509	3.81684	3.88206	3.91249	3.88892
15197256	3.2899	3.27903	3.21287	3.22585	3.26577	3.27176
15197260	9.1012	9.23385	9.15396	9.25006	9.14899	9.32725
15197296	6.16631	6.29626	6.10044	5.89592	6.05043	6.02722
15197302	5.31338	5.37725	5.07631	5.4526	5.46164	5.42443
15197310	6.72912	6.96776	6.85918	6.88342	6.90101	7.74344
15197335	4.26678	3.88399	3.87374	3.59027	3.85748	3.8424
15197339	8.76912	8.96068	9.07447	9.12229	9.37288	8.94403
15197349	3.01374	2.95776	3.10693	2.93353	2.91787	2.93617
15197361	5.07612	5.0005	5.10536	4.82469	5.0468	4.99112
15197375	5.31936	5.37182	5.37483	5.41323	5.15356	5.5582
15197393	4.28853	4.50488	4.22425	3.98329	4.18703	3.94464
15197406	6.19496	6.30402	6.29633	6.18135	6.11385	6.12272
15197432	6.41129	6.09355	5.98244	5.78423	5.84535	5.55075
15197472	5.1097	5.0877	5.08042	4.9942	4.96837	4.81986
15197479	9.08247	9.15562	9.40615	9.10529	9.00689	8.78842
15197494	4.70131	4.64006	4.96882	4.56134	5.21524	4.82649
15197500	5.30769	5.39903	5.82539	5.54606	5.86086	6.63194
15197512	4.90433	5.16084	4.93987	4.76484	4.55787	4.64589
15197534	3.65193	3.41047	3.57086	3.39804	3.56457	3.42675
15197540	3.44002	3.51612	3.45445	3.42667	3.46088	3.42059
15197544	4.23291	3.90274	4.27005	3.94149	4.044	4.05516
15197550	3.59074	3.72402	3.71353	3.64351	3.55666	3.73487
15197567	8.42967	8.5952	8.65936	8.10186	8.17613	8.1597
15197605	6.27202	5.68288	6.26049	6.24133	5.99922	5.9985
15197617	4.74912	4.73268	4.95087	4.76366	4.84632	5.44253
15197632	7.53105	7.82031	7.7303	7.25823	7.55344	7.39568
15197653	9.47338	9.48411	9.42948	9.72993	9.34991	9.8431
15197681	5.51908	5.55042	5.34712	5.24036	5.16659	4.9865
15197685	5.35827	5.27807	5.16244	5.30029	5.24631	5.33136
15197716	3.73615	3.68628	3.73025	3.81966	3.77493	3.77724
15197723	7.1314	7.14135	6.95306	6.77052	6.99439	6.74561
15197733	4.45048	4.33264	4.31838	4.40617	4.51563	4.5552
15197741	5.25451	5.09714	5.09357	5.62416	5.46905	5.7016
15197751	4.2221	4.01448	3.91969	4.25273	3.84535	4.10687
15197760	6.32686	6.02903	6.37143	6.57695	6.45471	6.41254
15197808	7.82098	7.70871	7.79083	8.09389	8.07368	7.9313
15197826	6.33097	6.41561	6.63257	7.13621	7.34073	7.04352
15197832	5.85036	5.79383	6.01416	6.07777	5.79813	6.00441
15197838	5.71693	5.71739	5.57124	5.24267	5.32626	5.28764
15197840	3.14234	3.1384	3.12157	3.03873	2.93706	3.12426
15197842	4.34004	4.49299	4.34021	4.55472	4.45623	4.43669
15197844	9.12223	8.93196	9.18679	8.92699	8.84554	8.74597
15197893	8.31849	8.54662	8.67977	8.61374	9.0226	8.56495
15197915	5.50906	5.52392	5.6511	5.19544	5.49108	5.63176
15197918	4.51863	4.36566	4.36723	4.52309	4.59332	4.45602
15197923	10.9884	11.0067	11.0872	10.9608	10.7792	11.0181
15197927	5.6276	6.17917	5.99499	5.54201	5.56178	5.33665
15197933	4.45695	4.59781	4.54978	4.50522	4.50887	4.56205
15197939	7.1171	7.03144	7.2287	6.8717	7.31935	6.96489
15197946	6.01852	5.4451	5.71458	5.77848	5.71377	5.58982
15197959	7.68864	7.38167	7.48127	7.60896	7.31364	6.86869
15197966	3.96172	3.94717	4.1448	3.892	3.84446	3.82222
15197979	5.39844	5.42289	5.4849	5.54276	5.35338	5.05582
15198012	4.70901	4.51541	4.67402	4.53473	4.5133	4.40839
15198033	6.64908	6.41432	6.66226	6.83919	7.17507	7.33661
15198036	8.45793	8.54282	8.47656	8.87568	9.09575	9.41883
15198055	8.14635	8.33076	8.44808	7.88119	8.3342	8.42173
15198078	8.21804	8.50829	8.35825	9.03722	9.23001	8.93178
15198080	4.8607	5.04035	5.00525	4.69078	4.81743	4.72133
15198117	3.79848	3.88843	3.86857	3.74443	3.92555	3.78019
15198119	3.19557	3.16194	3.1703	3.15818	3.12017	3.06452
15198121	3.18353	3.22065	3.1204	3.41283	3.28695	3.09098
15198123	3.68608	4.03507	3.98239	3.76729	3.71321	3.62607
15198125	3.12678	3.09731	2.98216	2.94839	2.96159	3.09411
15198127	3.32449	3.38843	3.35383	3.26511	3.20736	3.30502
15198129	6.57889	6.44336	6.85602	7.01194	6.465	6.40454
15198190	7.76155	7.54291	7.69265	7.67928	7.42281	7.37825
15198195	5.87893	6.07176	6.17327	5.74276	6.33691	5.78978
15198197	9.4175	9.12576	9.34249	9.24182	9.19218	9.40265
15198202	6.45838	6.24089	6.24939	6.01549	6.39627	6.71274
15198224	4.63299	4.85727	4.66277	4.93648	5.09914	5.48495
15198261	7.75104	7.75156	8.02014	8.36126	8.70246	9.20398
15198264	4.96649	5.39716	5.18963	5.62404	5.63266	6.07369
15198267	10.3522	10.503	10.5391	10.827	10.965	11.0905
15198273	7.24732	7.38286	7.46422	7.14369	7.09401	7.23498
15198324	4.13288	3.96377	4.05592	4.01891	3.99791	3.86043
15198329	6.81341	6.85766	6.95545	6.61195	6.93454	6.58749
15198332	4.34068	4.54708	4.27163	3.95842	4.04295	4.14494
15198386	4.83412	4.7234	4.74539	5.01326	4.77843	5.24256
15198389	3.23209	3.21895	3.1819	3.29365	3.1555	3.26305
15198418	10.1529	10.1269	10.0804	9.98336	9.7089	10.0489
15198434	10.1086	10.0601	9.89762	9.43796	9.81836	9.94718
15198440	11.0444	11.0545	11.0106	10.7935	10.8815	10.7907
15198445	6.01032	6.02912	5.59354	5.48419	6.02385	6.65043
15198453	4.72427	4.5825	4.31209	4.47421	4.42117	4.45375
15198484	8.27543	8.2917	8.20306	8.09059	8.24801	8.00196
15198507	4.66044	4.74638	4.57052	4.46417	4.60776	4.67228
15198518	5.86813	5.41291	5.54216	5.45316	5.39092	5.17117
15198535	4.02233	4.00392	3.90546	3.93167	3.88952	3.74726
15198569	4.29341	4.2505	4.09266	4.11625	4.3172	4.17944
15198596	3.7479	3.91402	3.74016	3.80198	3.47219	3.54219
15198601	6.03962	5.92085	5.91231	5.80173	5.78556	5.59349
15198633	8.58298	8.47154	8.545	8.57612	8.41873	8.50755
15198642	9.80287	9.85371	9.67857	9.6891	9.94917	9.95329
15198671	4.95363	5.37261	5.18406	4.82421	5.08262	4.87343
15198678	3.78568	3.69527	3.65991	3.58542	3.71359	3.7408
15198726	4.82627	5.04569	4.91214	5.31583	4.95467	5.38086
15198737	5.27606	4.93848	5.31979	5.13482	5.14447	4.85465
15198746	9.73305	9.67301	9.6932	8.77447	9.35189	9.04697
15198751	5.49519	5.3183	5.3997	5.09205	5.27901	5.10717
15198763	7.81612	7.93933	7.77823	7.54391	7.5875	7.84327
15198769	3.76701	4.1285	3.83935	3.56067	3.50266	3.82937
15198773	5.8992	6.17321	5.78786	5.70965	5.66554	5.84225
15198777	3.54027	3.3749	3.38576	3.56922	3.31917	3.28493
15198781	3.89954	4.16984	3.85667	4.17999	4.02511	3.93687
15198783	4.3499	4.14612	4.24602	4.1073	4.28172	4.47601
15198787	4.96742	4.8388	4.97229	4.94295	5.05118	4.91845
15198789	4.60638	4.46386	4.46032	4.28525	4.38051	4.41766
15198791	3.77425	3.69767	3.71772	3.48317	3.73324	3.68338
15198793	4.15767	4.47451	4.50541	3.98698	3.98914	4.06777
15198797	5.36192	5.3119	5.53331	5.22508	5.57695	5.73475
15198799	3.44337	3.2606	3.32659	3.16678	3.16765	3.23767
15198803	3.8725	3.50669	3.95656	3.63194	3.59464	3.48524
15198805	7.43317	7.47772	7.27771	7.67272	7.161	6.91776
15198810	6.75644	6.60973	7.22628	7.29517	7.32836	8.00721
15198833	6.52847	6.23329	6.53816	6.11413	6.37837	6.35757
15198837	5.07856	4.70922	5.31487	4.80398	4.90324	4.60181
15198839	9.69343	9.94739	9.20672	9.37562	9.16852	9.99772
15198843	7.10152	7.20579	7.23451	7.71613	7.75991	8.12731
15198864	8.70539	8.62916	8.76527	8.81186	8.63371	8.52895
15198883	8.37206	7.91833	8.10915	8.08777	7.62832	7.19374
15198897	8.95995	9.01657	8.96695	8.66564	8.606	8.61994
15198909	8.57358	8.47529	8.64175	9.18646	9.55867	9.27066
15198921	8.9226	8.60317	8.91645	9.22129	9.41386	9.29238
15198926	8.65546	8.73593	8.73953	8.50616	8.48481	8.34018
15198948	6.2574	6.28553	6.56279	6.56154	6.96613	7.37164
15198964	4.43054	4.65952	4.74626	4.78464	4.79838	4.70391
15198973	6.47714	6.33701	6.75511	6.9559	7.03963	7.05967
15198991	7.41972	7.50173	7.50444	7.32943	7.4958	7.20048
15198998	9.47265	9.58029	9.60006	10.2014	10.2537	10.2483
15199008	5.59514	5.63472	5.92321	5.52895	5.58672	5.33806
15199024	4.1647	4.96104	4.51477	4.30976	4.10431	4.03708
15199034	5.61319	5.88819	5.7144	5.73187	5.41843	5.22313
15199048	4.26322	4.48321	4.2519	4.22962	3.77791	4.03955
15199054	4.93608	5.32581	4.98473	4.85649	4.67869	4.59833
15199061	5.22828	5.39682	5.39507	4.9092	5.26807	5.09075
15199074	7.42121	7.14961	7.35549	7.32861	7.03858	7.09514
15199088	3.29108	3.36789	3.22702	3.36035	3.56806	3.29418
15199092	5.79387	5.78773	5.81471	5.80563	5.92783	6.06114
15199119	5.90216	6.06818	6.01685	5.75792	5.95461	5.73475
15199142	5.55848	5.74826	5.84659	5.26157	5.89306	5.52207
15199157	5.55045	5.77659	5.34021	5.71111	5.55628	5.24665
15199169	7.59401	7.4497	7.679	7.83267	7.65415	7.18339
15199186	8.86977	8.63383	8.87143	8.67258	8.805	8.22196
15199196	7.64682	7.52537	7.91868	7.78169	7.65095	7.51033
15199232	6.13529	5.93218	5.94367	5.82219	5.97425	5.63127
15199257	4.74122	4.67203	5.09429	4.42822	4.59575	4.84878
15199282	9.981	10.0007	10.1257	9.86892	9.92488	9.53668
15199316	5.69475	5.89727	5.58714	5.45824	5.67697	5.54189
15199318	6.67691	6.15957	6.2976	6.43834	6.18519	6.23795
15199337	10.3106	10.3735	10.3454	10.5639	10.3523	10.1292
15199348	5.85953	5.78919	5.98565	6.00322	6.13695	6.6015
15199354	9.17165	9.19592	9.32226	8.91364	8.8909	9.03799
15199412	3.97591	4.27492	4.07324	4.06271	4.17568	3.90142
15199434	8.83192	8.87322	9.11796	8.75173	9.11317	8.65917
15199455	5.19725	5.38179	5.23315	5.40729	5.37177	5.19456
15199496	4.96467	4.92253	4.7116	4.43674	4.77276	4.46968
15199511	5.31776	5.26762	5.26971	4.94325	4.902	4.81168
15199522	8.43155	8.22171	8.25844	8.26739	8.24486	7.5735
15199525	4.63969	5.08291	4.70536	4.71483	4.77698	4.85376
15199528	5.31676	5.27933	5.15444	5.12713	4.90416	4.96187
15199552	4.068	4.13105	4.19625	4.004	4.09448	4.04114
15199554	4.29775	4.27854	4.45603	4.27681	4.23075	4.37789
15199559	9.71402	9.67182	9.47882	9.40927	9.45314	9.25957
15199571	4.4418	4.58844	4.43615	4.61528	4.34392	4.44611
15199576	3.4582	3.49599	3.34247	3.39236	3.3575	3.40465
15199581	6.51609	6.15434	6.07852	6.10832	6.31006	6.20686
15199584	5.67839	5.49623	5.98247	6.63565	6.31318	6.66067
15199591	6.81347	6.43661	6.54902	6.5008	6.22345	6.24081
15199601	3.84671	3.51768	3.85744	3.8509	3.75017	3.72299
15199603	3.64917	3.56223	3.57096	3.44377	3.52039	3.44288
15199605	3.68671	3.65754	3.81364	3.97332	3.68759	4.01658
15199607	3.36715	3.39719	3.39204	3.24351	3.37155	3.41276
15199609	3.32311	3.47782	3.35338	3.41105	3.58223	3.5211
15199614	3.40179	3.60402	3.55447	3.12265	3.36373	3.11062
15199623	3.51565	3.29843	3.30028	3.22712	3.36298	3.20581
15199625	4.07001	4.04327	4.10238	3.91793	4.04095	4.13485
15199627	3.53687	3.42049	3.31665	3.38919	3.58735	3.65003
15199629	3.24153	3.33658	3.40485	3.32629	3.27299	3.1833
15199639	7.73722	7.55328	7.66045	8.04352	8.4211	8.04523
15199645	4.8306	5.3317	4.85284	4.65995	4.87756	4.79281
15199662	6.65637	6.49675	6.51318	7.27883	6.74254	6.85016
15199676	5.15519	5.4678	5.22814	4.75807	5.08659	4.80587
15199678	6.34294	6.89098	6.85774	6.60138	6.84711	6.74655
15199691	5.719	5.93883	5.66095	5.49182	5.56175	5.32129
15199702	5.13083	5.26312	5.26799	4.64377	5.05813	5.12599
15199704	4.91215	5.09687	4.95618	4.78836	4.67708	4.69123
15199719	4.79668	4.9275	4.89053	4.75705	4.93767	4.67524
15199721	5.919	5.82611	5.42605	5.42474	5.65707	5.63729
15199723	4.81788	5.23274	5.09418	5.14689	5.01278	4.99442
15199742	3.41522	3.59812	3.49452	3.80251	3.47176	3.47042
15199748	4.27769	4.73934	4.53898	4.78073	4.25264	4.42416
15199750	3.8913	4.04925	3.85242	3.62498	3.94156	3.94106
15199754	4.04331	4.18551	4.1921	4.05694	4.48509	3.89297
15199756	3.98131	3.9969	4.03968	3.95032	4.05795	4.0138
15199758	3.8055	3.77204	3.71817	3.80691	3.83724	4.24896
15199760	9.65989	9.58267	9.78632	9.47204	9.60097	9.46981
15199778	6.07762	6.24414	6.28666	6.14568	6.36299	5.90807
15199788	8.01182	7.92562	8.05857	7.92624	7.95487	7.71248
15199804	4.89723	5.27983	5.30274	5.52196	5.2553	5.25653
15199811	6.0493	5.85902	5.99152	6.22156	6.05877	5.79086
15199816	10.3703	10.6448	10.3532	10.4016	10.5548	10.7652
15199821	3.73167	3.68944	3.72241	3.40936	3.50216	3.41739
15199854	3.63496	3.55168	3.48554	3.53079	3.47243	3.42013
15199904	8.25411	8.33739	8.28084	8.24024	8.27533	8.52014
15199948	4.68743	4.61552	4.10023	4.07714	4.22814	3.97349
15199952	4.31988	4.5235	4.22513	4.30857	4.07659	4.27224
15199957	3.86709	3.76126	3.63531	3.38947	3.43308	3.6156
15199966	9.5388	9.38828	9.41078	9.06065	9.18739	9.0603
15199982	9.00343	9.06804	9.10773	9.45062	9.50267	9.31012
15199997	7.55767	7.80141	7.90574	7.67064	8.28637	7.76968
15200061	9.10289	9.23141	9.20164	9.1349	9.40637	9.0429
15200073	3.55014	3.55033	3.54702	3.48534	3.46269	3.5453
15200096	11.0689	11.1115	11.1057	11.0843	11.0782	11.1629
15200118	4.48557	4.6049	4.46255	4.51306	4.44187	4.37564
15200128	4.67329	4.88836	5.1839	5.20791	5.33323	5.43831
15200155	6.50078	6.13608	6.68687	6.45614	6.37778	5.99995
15200157	4.39289	4.07632	3.92798	3.88918	3.78438	3.80103
15200159	3.72982	4.071	3.75701	3.33086	3.53492	3.58319
15200163	5.18722	5.51959	5.36859	4.8474	5.17744	5.18192
15200187	6.57678	6.57207	6.69427	6.55342	6.62693	6.99483
15200203	4.48013	4.38054	4.34915	4.30914	4.43537	4.065
15200213	5.05612	5.13616	4.80972	4.42395	4.85338	4.49972
15200238	3.74367	3.90091	3.91895	3.83598	3.66855	3.76802
15200258	7.12932	6.65758	7.25995	7.56573	7.93157	8.69441
15200262	5.10419	4.6537	4.54681	4.61749	4.42632	4.43258
15200324	5.78101	5.97321	5.90932	5.74748	5.59635	5.65957
15200339	7.19605	7.15202	7.21592	6.75901	6.67948	6.46237
15200363	7.33267	6.99152	7.47373	7.33179	7.23049	6.68081
15200373	9.07821	9.05252	9.08832	9.22555	8.96487	8.85167
15200397	3.50007	3.64029	3.35367	3.59416	3.66464	3.76377
15200404	3.80153	3.87085	3.95777	3.80492	3.87956	3.8493
15200416	7.00846	6.95561	6.97532	6.99919	6.92581	6.88147
15200426	4.02277	4.07059	4.00641	3.92524	4.1348	3.77321
15200442	4.77097	4.60351	4.34692	4.31576	4.54619	4.51494
15200458	4.65433	4.88797	4.74164	4.54095	4.71412	4.32124
15200461	7.58437	7.85956	7.49751	7.40984	7.39434	7.96697
15200489	4.18637	4.0583	3.81493	3.75881	3.73593	3.81307
15200509	8.27762	8.36801	8.24989	7.9403	8.13481	8.32905
15200534	5.42512	5.51816	5.48734	5.3701	5.62922	5.64784
15200567	4.46793	4.59753	4.39675	4.23259	4.36542	4.26432
15200572	4.51599	4.53124	4.66975	4.49301	4.67866	4.35727
15200577	4.5353	4.68643	4.42827	4.5385	4.52545	4.38432
15200586	6.35091	6.35089	6.23017	5.95512	6.22885	5.75029
15200593	7.88799	7.48543	7.59384	7.73474	7.71105	7.61891
15200601	8.31237	8.25435	8.0778	8.05982	8.52944	7.82678
15200603	5.19496	5.19059	5.08414	4.82945	4.92099	4.7921
15200612	9.22721	8.68923	8.5319	7.87525	8.30562	7.87237
15200623	5.10998	5.04472	5.18012	5.16032	4.74373	4.84318
15200630	4.14223	4.10079	3.92367	3.94211	4.0035	3.92461
15200640	9.2635	9.26289	9.31494	9.18173	9.25957	9.27327
15200653	6.26751	6.18131	7.17942	6.68372	6.72694	6.60105
15200655	6.63521	6.6073	6.90071	6.91435	6.86197	7.63934
15200668	10.74	10.6282	10.6014	10.6731	10.2278	10.2153
15200687	5.86967	5.9467	6.0087	5.85846	5.77936	5.43498
15200714	4.74013	4.59283	4.44004	4.59826	4.65407	4.38694
15200721	4.11421	4.01211	3.87693	3.95241	3.93079	3.98215
15200730	6.88596	7.67168	7.69237	6.81625	7.53497	7.59837
15200737	8.13101	7.91114	7.99164	8.47172	8.79221	9.14973
15200744	8.82913	9.13333	8.86887	8.27533	8.81794	8.92859
15200757	6.9537	6.78622	6.94379	6.53163	7.03212	6.85421
15200766	8.20269	8.3646	8.64445	8.59172	8.83247	9.03799
15200771	8.90716	8.92962	8.90891	8.81812	8.84953	8.89808
15200774	4.4385	4.65732	4.3582	4.31827	4.21699	4.24562
15200788	9.39386	9.26212	9.31361	9.62306	9.32873	9.33518
15200790	8.91782	8.82515	8.80586	8.50183	8.66231	8.79405
15200817	4.87908	5.42341	5.02948	5.24202	5.45596	5.5414
15200821	4.1923	4.38627	4.33527	4.26321	4.17666	4.21782
15200829	8.50002	8.60596	8.70827	8.42482	8.41096	8.12094
15200890	4.10632	3.99295	3.69469	3.65336	3.82029	3.76856
15200894	4.11477	3.92254	4.07354	3.98805	4.09875	4.12104
15200909	5.77927	5.81131	5.91833	5.68986	5.70427	5.66749
15200922	7.78646	7.59773	7.46885	7.16075	7.40684	7.34164
15200953	3.76361	3.94566	3.74264	3.52489	3.55403	3.59967
15200982	5.61995	5.82989	5.89762	6.49853	6.09068	6.74462
15200991	9.63142	9.80273	9.58583	9.40702	9.47054	9.93742
15200997	3.79799	3.93697	4.03905	4.35913	4.83009	4.97204
15201001	4.51859	4.66132	4.66954	4.54364	4.58945	4.61715
15201008	7.43273	7.47752	7.71163	7.78964	7.72571	7.66555
15201042	4.37195	3.93426	4.15014	3.89686	3.88351	3.97693
15201059	8.56574	8.5687	8.80024	8.32991	8.65231	8.42043
15201071	10.8979	10.8608	10.9352	10.7687	10.7331	10.8017
15201080	6.793	6.71475	6.97051	6.84802	6.9799	6.95474
15201108	6.78886	6.87768	6.57436	6.9916	6.82952	6.50464
15201112	9.71426	9.67639	9.7062	9.83461	9.57779	9.89498
15201139	6.30614	6.17208	6.33015	7.26201	6.96678	7.35256
15201160	7.31748	7.15547	7.36561	8.16672	7.41841	8.20541
15201208	4.78491	4.83508	4.77124	4.46854	4.73581	4.84969
15201212	5.11617	4.91652	5.36938	5.18635	5.48559	6.15968
15201229	8.29528	8.41707	8.53522	8.24317	8.4732	8.21457
15201241	10.5767	10.5161	10.6906	10.292	10.2393	10.1844
15201251	4.47466	4.68325	4.75295	4.54892	4.48705	4.2622
15201258	9.45026	9.44154	9.51345	9.42069	9.62998	9.25036
15201283	5.04944	5.05821	4.80939	4.83167	4.91275	4.62115
15201287	8.8556	9.0478	8.96492	8.67409	8.64534	8.90167
15201305	5.32308	5.18086	4.90274	5.83535	5.85011	6.28052
15201319	5.25673	5.32057	5.11341	5.03266	5.15412	5.42108
15201325	6.87219	6.79092	7.06487	6.74701	6.89697	6.71414
15201369	9.7529	9.85121	10.039	9.68626	9.60441	9.49669
15201377	5.98298	6.24427	6.07606	5.4074	5.92325	5.6929
15201379	9.86286	9.94739	10.1131	9.97263	9.87099	9.5274
15201391	3.67083	3.65151	3.44886	3.66004	3.44786	3.74901
15201407	3.67477	3.64109	3.50322	3.47075	3.59111	3.44742
15201422	3.07634	3.30236	3.39166	3.04425	3.22465	3.09685
15201442	9.68597	9.27132	9.40759	9.50974	9.36501	8.85526
15201462	9.47097	9.16415	9.44462	9.61667	9.43562	8.8898
15201481	8.82729	8.76117	8.8807	8.87924	8.53167	8.43525
15201503	9.22728	9.19318	9.25915	9.19116	9.05487	8.90247
15201513	9.01745	9.17244	9.1429	8.76042	9.01961	8.86191
15201529	6.61853	6.98794	6.68179	6.79843	6.90833	7.14289
15201551	4.19519	4.30271	4.18558	4.08108	4.30453	4.04881
15201553	8.19592	8.30049	8.38376	8.33081	8.47472	8.49906
15201569	6.94571	7.11716	7.20833	7.80078	7.76119	7.95321
15201579	11.3473	11.3295	11.3572	10.9792	11.3337	11.1191
15201585	4.23117	4.35621	4.16333	3.96613	4.263	3.9349
15201589	3.55911	3.61221	3.42241	3.45121	3.48224	3.64766
15201597	6.01821	5.90603	6.09354	5.65545	5.67027	5.47927
15201636	8.74852	8.88106	8.84956	8.43393	8.57739	8.60791
15201658	6.79917	7.06977	7.0007	6.75873	6.83504	6.77269
15201664	3.2621	3.20825	3.25542	3.28389	3.23767	3.36501
15201671	8.86642	9.05911	9.09528	9.03943	9.03944	9.10185
15201710	9.5768	9.64757	9.71921	9.39269	9.59064	9.58623
15201720	3.17935	3.10236	3.04154	3.05218	3.03691	3.14716
15201722	3.59189	3.8031	3.59431	3.47448	3.59073	3.46222
15201724	8.18646	8.06846	8.38812	8.07068	8.10821	8.26489
15201759	3.31457	3.40636	3.4916	3.34253	3.38374	3.52083
15201761	8.46382	8.34059	8.75242	8.97126	8.78044	8.99381
15201770	6.56004	6.09564	5.73816	6.89939	6.52475	6.43274
15201775	5.63818	5.4656	5.50325	6.51232	6.29447	6.18681
15201790	6.36799	6.4394	6.66971	7.072	6.48475	6.51323
15201794	4.51934	4.64065	4.28467	4.49955	4.59224	4.64817
15201804	10.0226	10.0228	10.1214	9.90297	10.0441	10.095
15201828	4.19545	4.60459	4.14218	4.11285	4.14894	4.22373
15201835	3.77067	3.6983	3.48908	3.57563	3.62893	3.56294
15201850	4.69734	4.65319	4.8872	4.78361	4.88495	4.79771
15201854	6.36819	6.63677	6.04541	6.04386	5.83109	6.03645
15201868	4.08842	4.01118	3.99955	4.18153	4.18904	4.59717
15201875	9.53447	9.5362	9.62477	9.5111	9.14728	9.49876
15201890	10.9992	10.9541	10.9268	10.7777	10.7948	10.6008
15201914	8.01984	8.31591	8.59056	7.78791	8.43701	7.91556
15201921	5.63795	5.5052	5.47349	5.4931	5.22122	5.3514
15201928	9.1887	9.20947	9.32804	9.1794	9.41044	9.44401
15201941	8.28942	8.45167	8.56385	8.35163	8.36837	8.82307
15201968	8.60742	8.36139	8.57109	8.98625	8.70252	8.69562
15201977	4.33889	4.46703	4.46391	4.0761	4.27126	4.04343
15201979	6.84377	6.56164	6.9113	7.21395	6.75496	6.50231
15201984	3.69631	3.96235	3.85672	3.81801	3.87493	3.60242
15201988	10.1464	10.2471	10.0282	10.0939	9.94404	10.196
15202000	3.89566	3.95661	3.8467	3.74897	3.71061	3.55939
15202004	6.94398	7.29469	7.20608	7.02676	7.03004	7.23721
15202019	9.39898	9.3397	9.45757	9.20923	9.01965	9.11314
15202026	5.61249	5.54259	5.808	5.73172	5.49517	5.28099
15202050	6.9091	7.31886	7.09586	6.96481	6.9204	6.85475
15202059	5.70901	5.77307	5.86898	5.73054	5.81395	5.9641
15202081	8.97992	8.5769	8.87678	8.42499	7.75749	7.902
15202099	9.85751	10.0518	10.0271	10.1974	10.1787	10.2973
15202126	5.65625	5.39479	5.77358	5.9655	5.71152	6.02223
15202128	9.47908	9.36	9.42415	9.16718	9.31867	9.09179
15202142	3.8777	4.10839	3.90017	3.85206	3.63275	3.62882
15202146	3.56096	3.90012	3.85528	3.57949	3.54403	3.53351
15202160	3.07112	2.99566	3.1817	3.14214	3.06355	2.99435
15202162	3.18982	3.27269	3.21771	3.27568	3.12592	3.16609
15202164	9.5536	9.60706	9.64152	9.33344	9.32348	9.46056
15202166	7.14867	7.05694	7.04431	7.00936	6.9674	6.8605
15202186	5.94897	6.21662	6.02727	5.97645	6.0346	5.97271
15202215	9.3263	9.32908	9.29039	8.90413	9.13606	9.00597
15202250	6.80381	6.79495	6.88432	6.68362	6.90291	6.50194
15202255	9.26159	9.19349	9.1957	9.34973	9.33046	9.15293
15202269	7.88143	8.13115	8.01224	8.00515	7.57818	7.88947
15202290	5.29121	5.34835	5.30774	5.44561	5.46432	5.38796
15202308	3.63187	3.48343	3.50172	3.44328	3.34686	3.3778
15202310	3.94825	4.00536	3.98523	4.20502	3.94348	4.0892
15202312	3.30924	3.29926	3.05387	3.08713	3.1914	3.39317
15202326	3.47457	3.46125	3.40341	3.56036	3.54593	3.53737
15202377	3.43698	3.59702	3.41065	3.60453	3.51256	3.39356
15202392	9.26294	9.46671	9.33528	8.9831	9.32358	9.42115
15202399	4.35063	4.47362	4.31634	4.21555	4.37515	4.30371
15202416	5.68543	5.77683	5.41147	5.55392	5.69661	5.44851
15202469	4.63771	4.74291	4.59937	4.71961	4.87645	4.62572
15202509	6.96511	6.69747	6.84941	7.02572	6.61528	7.01849
15202513	9.34109	9.34923	9.41346	9.31613	9.5395	9.45576
15202520	3.86072	4.16579	3.60636	3.72856	3.65288	4.03757
15202526	11.0873	11.1205	11.1351	10.9853	11.0735	11.1034
15202536	4.35507	4.5608	4.55374	4.24689	4.26707	4.19705
15202556	3.75031	4.17843	3.82728	3.76881	3.64422	3.67186
15202572	5.37745	5.04914	5.64208	5.65888	4.36381	5.08231
15202582	5.08129	4.97961	5.17111	5.08762	5.02447	4.90894
15202598	9.15875	9.19082	9.18224	9.04185	8.95458	9.24502
15202618	9.28585	9.40326	9.33759	9.36126	9.38334	9.60534
15202643	9.46485	9.7794	9.66898	9.34642	9.56347	9.60052
15202686	5.95773	5.77376	5.94787	6.29137	6.51144	6.93141
15202689	6.54431	6.42997	6.41784	6.19414	6.43906	6.46934
15202703	7.12927	7.4401	7.44813	7.26332	7.54977	7.36603
15202715	10.9852	11.2068	11.1346	11.0826	11.1327	10.9425
15202726	4.39644	4.31388	4.29557	4.70509	4.90496	5.57584
15202742	9.2382	9.47442	9.4478	9.21857	9.34494	9.30779
15202760	4.31539	3.62777	3.71797	3.82005	3.76202	3.866
15202769	9.70257	9.7852	9.63388	9.64844	9.78447	9.93232
15202780	10.6395	10.3679	10.4806	10.3649	10.33	10.3954
15202809	6.81553	7.11288	6.95619	6.63144	6.72835	6.68149
15202830	8.2662	8.4862	8.46422	7.85663	8.29118	8.164
15202865	7.54836	7.54479	7.15512	7.32273	7.20266	6.95797
15202876	3.86382	3.938	3.59868	3.71349	3.73528	3.74214
15202897	5.29127	5.63392	5.36228	5.31134	5.45975	5.24419
15202909	5.18131	4.84572	5.47917	5.2857	5.53262	6.11279
15202919	6.4233	6.34297	6.71281	6.84488	6.89754	6.77052
15202928	4.48306	4.15627	4.27102	4.66865	4.25278	4.18716
15202930	6.06623	5.99329	6.24925	6.28426	6.11932	6.2894
15202937	4.8634	4.41862	4.44019	5.256	4.73976	5.086
15202950	7.80295	7.9811	7.80565	7.54948	7.63506	7.58137
15202967	4.80504	4.83561	4.68209	4.58464	4.68705	4.56138
15202970	3.6474	3.50316	3.44253	3.3904	3.43849	3.44638
15202974	10.7932	10.8615	10.6737	10.728	10.9181	10.8433
15202997	4.97198	4.84802	5.16441	5.73203	4.75979	5.08957
15203014	6.89883	7.21331	7.24946	7.23148	7.20424	7.36327
15203037	5.11371	4.83654	5.00063	5.36579	5.02921	5.11311
15203043	6.51378	6.65552	6.74135	7.17517	7.04985	7.19336
15203055	8.89873	8.5516	8.8573	8.78602	8.77775	8.82027
15203069	10.0525	9.99934	9.99504	10.0385	10.0275	9.96064
15203087	4.42881	4.5583	4.55357	4.7172	4.49718	4.68165
15203093	8.95794	9.23447	9.12906	8.69209	8.92158	8.88575
15203118	5.23519	4.99901	5.53258	4.55483	4.59653	4.604
15203133	5.72274	6.01456	5.94147	5.65859	5.73039	5.44419
15203158	10.8645	10.8492	11.0161	10.7274	10.8358	10.8215
15203191	11.3035	11.3431	11.456	11.5694	11.4629	11.0216
15203195	4.92448	5.06088	5.57183	5.00345	5.07284	4.99543
15203202	5.19347	5.27369	5.06505	4.99078	5.13893	5.00753
15203215	9.37479	9.16353	9.20927	9.59655	9.49623	9.94702
15203237	9.20745	9.06512	9.24479	9.10846	8.95953	8.61742
15203298	4.66495	5.03477	5.04087	4.9216	4.89948	4.83536
15203305	4.87765	4.7057	4.88149	5.07261	5.09785	5.08994
15203308	8.23643	8.15004	8.24621	8.27386	8.33569	7.9522
15203312	6.2272	6.14078	6.32155	5.99148	5.94654	5.83309
15203322	5.48694	5.18575	4.83944	5.03436	5.04611	4.59294
15203328	5.16012	5.32456	4.95686	4.82476	4.99246	4.99362
15203342	10.4826	10.4036	10.4237	10.1884	10.196	10.3501
15203355	9.14325	8.72435	8.88569	8.89687	8.53135	8.4014
15203377	5.87616	5.86267	6.17989	5.57455	6.46918	5.49768
15203395	5.92886	6.07992	5.81358	5.92935	6.3105	6.11272
15203399	4.02719	4.15631	3.97255	3.92458	3.933	3.75007
15203402	5.22365	5.78309	5.81703	5.01537	5.3516	5.04481
15203405	4.36267	4.72224	4.36022	4.22923	4.16087	4.21776
15203411	10.3448	10.3516	10.3616	10.4099	10.2406	10.3264
15203437	9.16382	9.13179	9.03413	9.2316	9.28586	9.01232
15203449	4.86775	4.66967	4.99531	5.06332	4.70426	4.71803
15203468	3.98293	4.1966	4.01123	3.80073	3.94499	4.0552
15203474	4.27061	4.58141	3.9682	4.26152	4.2292	4.11188
15203479	4.59415	4.76521	4.5508	4.38266	4.49492	4.31207
15203514	10.0962	10.2824	10.3404	10.0111	10.2461	10.2059
15203548	10.4502	10.4626	10.4877	10.3216	10.2898	10.4182
15203573	6.76924	6.81031	6.83644	6.38014	6.76105	6.76255
15203577	5.09641	4.92358	5.27889	5.2232	5.02022	5.35867
15203583	7.65308	7.69825	7.65098	7.7839	7.83121	8.05629
15203617	9.90275	10.1576	10.0618	10.0527	10.1482	10.1289
15203633	10.4286	10.6163	10.5858	10.1583	10.9316	10.9211
15203643	5.51747	5.59291	5.63746	6.07732	6.03073	6.86366
15203677	4.68769	4.52023	4.40762	4.65714	4.84197	4.62665
15203687	3.67293	3.7954	3.71711	3.57695	3.50967	3.53173
15203689	6.69671	6.59333	6.50989	6.79811	6.7901	6.80827
15203694	8.39459	8.72911	8.64467	8.47354	8.46634	8.67393
15203728	10.0812	9.98034	10.0794	10.7189	10.5556	10.717
15203730	5.14874	5.31087	5.43911	5.28455	5.66356	5.35363
15203751	8.87797	8.78908	8.88438	9.03151	8.75434	8.55782
15203756	10.3675	10.5685	10.4445	10.2682	10.407	10.4117
15203766	5.20917	5.1526	5.26516	5.20298	5.26013	5.40406
15203782	5.36665	5.60497	5.34273	5.16274	5.32393	5.13113
15203801	5.62154	5.55737	5.6878	5.84444	6.01107	6.37714
15203807	7.48509	7.06022	7.22371	7.38056	7.02408	6.9443
15203821	5.08298	4.77932	4.93913	4.60554	4.69878	4.47781
15203823	8.39614	8.49265	8.32907	8.55253	8.71524	9.01446
15203841	6.14344	6.30381	6.2291	6.20471	6.09453	5.93453
15203844	3.71476	4.07065	3.80107	3.88295	4.12376	4.52048
15203846	3.61596	3.4453	3.48525	3.68581	3.32431	3.58125
15203848	8.09326	7.89896	7.91574	8.44098	8.41856	8.62981
15203854	11.4605	11.3956	11.5087	11.2496	11.2405	11.4521
15203869	4.2037	4.35985	4.44995	4.25665	4.37997	4.83375
15203882	9.71304	9.77891	9.64699	9.65811	9.34286	9.47482
15203918	7.52139	7.76728	7.49312	7.73031	7.54199	8.19477
15203930	3.88995	3.95884	4.04023	3.7751	3.86072	3.79823
15203934	8.11148	8.477	8.28715	9.06014	8.96964	9.34424
15203956	5.17438	5.34065	5.28875	5.14962	5.18878	5.32343
15203973	5.1895	5.39669	5.45375	5.44397	5.31198	5.59302
15204002	9.35947	9.30991	8.93321	9.23804	8.60409	8.5282
15204034	4.74994	4.79692	4.57939	5.16322	5.18903	4.87709
15204048	4.07976	3.66236	3.6885	3.5702	3.58753	3.58438
15204076	5.60342	5.62334	6.01889	5.79566	6.01184	6.01573
15204103	4.6079	4.49456	4.28235	4.19099	4.05619	4.0572
15204107	5.01168	5.18841	5.08457	5.20685	4.70523	4.90954
15204132	7.35916	7.44709	7.73866	8.19893	7.78024	7.92858
15204149	10.1141	9.76212	9.68037	10.0692	9.29055	9.47084
15204154	7.65971	7.45151	7.61592	6.55441	6.45725	6.92552
15204171	8.8775	8.96703	8.80724	8.79166	8.86213	8.87204
15204197	3.77736	3.90519	3.66259	3.82807	3.85386	3.54703
15204203	8.38899	8.42914	8.33301	8.41021	8.52801	8.52887
15204225	9.08068	9.05974	9.13815	8.48245	8.90008	8.74539
15204236	7.89348	8.02954	8.08506	7.54905	7.70116	8.02286
15204242	7.2517	6.3595	6.73381	7.64998	7.57532	7.83422
15204247	2.98442	2.95861	2.90769	2.99975	2.90549	2.90923
15204249	3.46036	3.46124	3.48054	3.39795	3.54116	3.48054
15204251	2.98883	3.01956	2.94695	2.93199	3.00419	3.1074
15204253	2.9844	2.94128	2.92855	2.85449	2.89713	2.94693
15204255	3.28024	3.29738	3.25334	3.1135	3.25468	3.27658
15204257	3.48791	3.91082	3.69253	3.5482	3.7474	3.9369
15204261	6.2787	6.23934	6.54904	6.60764	6.3708	6.6225
15204265	6.76407	6.51628	6.61927	6.82356	6.81232	7.15758
15204275	6.16178	6.07769	6.27048	5.64844	6.2977	5.72669
15204294	10.166	10.1623	10.2096	10.3409	10.3496	10.2301
15204299	5.0843	4.94193	4.83131	4.65429	4.92589	4.76572
15204312	8.82697	8.63596	8.66337	8.86401	8.79811	8.73669
15204317	3.96439	3.88203	3.89162	4.57907	4.20765	3.93208
15204319	7.51512	7.51118	7.44253	7.93729	7.82362	8.10901
15204346	3.78284	3.78602	3.78605	3.78703	3.953	3.85225
15204350	5.66629	5.83635	5.84128	5.80067	5.6669	5.69358
15204355	5.42712	4.87718	4.88651	4.75612	4.73219	4.5977
15204375	4.24243	4.19919	4.12545	4.10491	4.07467	4.14613
15204431	3.60462	3.49266	3.4393	3.39014	3.37814	3.39654
15204438	4.34482	4.44595	4.20698	4.23596	4.14938	4.18967
15204459	6.19418	6.1929	6.008	6.46742	6.43712	6.47548
15204500	8.69349	8.48549	8.64308	8.50728	8.26588	8.15467
15204533	6.9712	6.68834	7.16573	7.01618	7.25163	6.86745
15204548	6.25751	6.07853	6.17151	5.93679	6.25735	5.95833
15204554	4.63587	4.7629	4.66023	4.4406	4.39289	4.41287
15204562	6.13695	6.1573	6.13183	6.44145	6.45448	6.12096
15204568	5.14993	5.6105	5.19547	4.96698	4.98826	4.97954
15204589	7.28497	7.19547	7.25371	7.34486	7.24901	7.13295
15204622	5.65087	5.6332	5.96856	5.486	5.74558	5.41822
15204646	6.57635	5.63871	6.14759	6.42262	5.35423	6.26394
15204655	6.11954	5.99465	6.3303	6.22503	6.22864	6.14487
15204676	5.73899	5.70276	5.32594	5.47546	5.38063	5.31214
15204691	7.76498	7.46834	7.47643	6.92907	7.1066	6.891
15204694	6.46384	6.74094	6.70207	6.90042	6.79176	6.62703
15204699	6.36064	6.10139	5.90425	6.17053	5.79504	5.74416
15204701	8.00628	7.97836	8.13541	7.56089	7.89553	7.95889
15204716	8.42422	8.08624	8.07954	8.07355	7.94568	7.54615
15204728	4.93867	4.79608	4.70239	4.45382	4.6483	4.27686
15204731	4.0008	4.03539	3.98449	3.86727	3.889	4.06567
15204757	5.63801	5.47909	5.62256	5.77553	5.54404	5.41938
15204774	3.5762	3.44694	3.56736	3.67278	3.65147	3.79949
15204790	8.43328	8.0822	8.3237	8.17319	8.08486	8.26664
15204797	6.63084	7.07156	7.17111	6.77814	7.36966	7.09182
15204808	9.32003	9.41491	9.47991	9.38738	9.62613	9.46671
15204820	4.49805	4.61193	4.62537	4.85658	4.37788	4.48413
15204824	10.3276	10.5159	10.3635	10.5381	10.4522	10.6267
15204843	5.42998	5.46803	5.59413	5.2186	5.03469	5.25762
15204857	11.449	11.5434	11.5123	11.4849	11.4965	11.47
15204870	5.72116	5.64184	5.58954	5.40432	5.63447	5.36359
15204883	5.10762	5.25183	5.08158	4.85541	5.1559	5.0235
15204911	4.6949	4.73532	4.61153	4.87508	4.85921	4.92518
15204921	11.3631	11.41	11.3651	11.3775	11.3369	11.4651
15204938	4.51369	4.28315	4.58151	4.74187	4.67679	5.11751
15204972	9.90505	9.94636	10.0069	9.63413	9.90249	9.81616
15204983	4.28696	4.19501	4.39231	4.58117	4.85625	4.89285
15204989	6.61503	6.56456	6.65189	6.53931	6.40269	6.73228
15204994	7.16928	7.0457	7.28848	7.11017	6.69673	7.0993
15205005	10.1043	10.0967	10.0366	9.9785	10.0181	10.0742
15205015	8.62764	8.71494	8.56139	8.25183	8.78268	8.5461
15205025	6.06778	6.34389	6.8232	5.92106	6.24543	5.97852
15205042	7.46716	7.62785	7.57948	7.15769	7.49576	7.01273
15205051	4.64725	4.77329	4.80983	4.49918	4.34199	4.32451
15205055	3.70009	3.70674	3.6869	3.70608	3.73472	3.86312
15205075	3.98519	3.74359	3.94775	4.01605	3.98669	4.12663
15205107	9.9828	10.072	10.0956	10.718	10.4032	10.7925
15205118	4.63189	4.84967	4.95404	5.05638	5.14655	5.45965
15205133	3.3999	3.28845	3.35693	3.28632	3.29087	3.2199
15205143	4.95665	5.07823	4.76787	4.33073	4.53589	4.43874
15205146	3.84181	3.81238	3.83669	3.76248	3.7317	3.78516
15205150	6.75564	6.96163	7.03095	7.08373	7.10366	7.31032
15205154	7.56232	7.52125	7.56089	7.16156	7.42456	7.90891
15205160	11.2795	11.2891	11.3132	11.2611	11.2847	11.1891
15205170	3.96031	3.73969	3.77153	3.65671	3.71126	3.64776
15205176	8.15742	8.30454	8.46174	8.05609	8.0751	8.39171
15205197	3.21181	3.18841	3.54173	6.73854	3.58739	4.00076
15205263	6.47347	6.51947	6.45095	6.53067	6.44567	6.92773
15205282	3.92039	3.82941	3.62133	3.5768	3.71298	4.06764
15205289	3.56664	3.44221	3.43147	3.52751	3.34664	3.33115
15205293	3.40416	3.55264	3.32919	3.18947	3.41432	3.35992
15205305	6.72123	6.54492	6.84378	7.2107	7.00531	7.64383
15205313	7.72421	7.62784	7.51978	7.48267	7.2686	7.43242
15205323	7.65095	7.47586	7.70961	7.468	7.37338	6.95932
15205338	6.8077	6.93312	6.90397	6.76058	6.47431	7.00033
15205412	5.64225	5.92508	6.53978	6.68683	6.46262	7.12142
15205420	9.46642	9.53381	9.486	9.40524	9.38266	9.63568
15205446	7.87882	7.7541	7.85487	8.09948	7.75591	7.72872
15205448	9.35306	9.46388	9.64172	10.1235	10.2947	10.2574
15205453	4.01796	4.36669	4.05773	4.34679	3.99657	4.09091
15205455	5.5401	5.32611	5.81788	5.5778	5.45104	5.59117
15205461	8.96593	9.17644	9.30586	8.48248	8.85758	8.62045
15205484	4.3774	4.47065	4.30337	4.50504	4.19921	4.12587
15205486	5.54501	5.79939	5.8172	5.37153	4.98415	5.45068
15205495	5.16882	4.85804	5.02149	4.60154	4.90678	4.79568
15205508	8.68914	8.86758	8.53353	8.50467	8.47096	8.53474
15205528	6.78957	6.86404	7.04666	7.06	7.22389	7.88903
15205557	5.45199	5.91375	5.14376	5.24503	5.02821	4.98551
15205567	9.87123	9.83728	9.75924	10.0423	9.75152	9.16265
15205575	6.7125	6.99813	6.85	7.1957	7.28393	6.76704
15205599	6.21728	6.00328	6.3544	6.42519	6.48637	6.82231
15205615	4.13676	4.04419	4.26306	3.99369	3.73996	3.94041
15205617	4.85727	4.62233	4.64841	4.26754	4.39425	4.4569
15205620	6.05421	5.59391	5.80794	5.71931	5.47739	5.23181
15205627	7.39828	7.72121	7.55477	8.19411	8.28423	8.53724
15205645	3.65064	3.81884	3.50712	3.63822	3.66559	3.58054
15205651	3.85253	3.91035	3.99196	3.93453	3.78328	3.7312
15205656	4.05769	3.99969	3.88848	3.79563	3.80687	3.79804
15205658	7.84853	7.99012	8.17574	7.52585	8.17897	7.959
15205665	4.69462	4.80182	4.93961	5.03864	5.04086	5.05142
15205685	6.75736	7.02903	7.26555	7.00039	7.33184	7.28763
15205696	5.93482	6.08048	6.27425	6.51174	6.63433	7.07092
15205707	4.01069	3.91097	4.02384	4.03286	3.83141	3.74058
15205712	7.76208	7.87153	8.05456	7.6995	7.65263	7.73145
15205753	5.80596	5.71939	6.02271	5.97693	5.94168	6.12647
15205760	7.4291	7.18956	7.37254	7.27936	7.23073	6.9166
15205782	9.19871	8.8876	8.81514	8.68631	8.62479	8.23328
15205791	7.42322	7.50054	7.65088	7.16025	7.29226	7.18351
15205809	5.11804	5.23841	5.21296	5.13163	5.15522	4.91491
15205824	5.07317	5.12703	4.98158	4.87937	4.88156	4.73256
15205848	5.14058	5.36806	4.9511	4.77124	4.71727	4.67067
15205858	5.38685	5.64894	5.26103	5.91256	5.74096	5.44884
15205870	4.72736	5.06962	4.81276	4.50705	4.59616	4.59497
15205901	7.45733	7.47215	7.53139	7.54143	7.50207	7.43936
15205916	8.31076	8.39778	8.2507	8.17476	8.27754	8.27086
15205930	4.3366	4.1756	4.19532	4.25227	4.20697	4.20852
15205950	5.58496	5.47591	5.55319	5.73771	5.80248	5.57624
15205957	6.88025	6.73269	6.59836	6.57273	6.59043	6.57945
15205989	7.01735	7.06701	7.14327	7.16712	7.38541	6.80641
15205997	5.62821	5.2521	5.29487	4.83751	5.35031	4.8486
15206003	6.23752	6.59058	6.19763	6.06972	6.22927	6.10025
15206011	5.09444	5.37118	5.09222	4.91771	4.98943	4.86104
15206037	8.95312	8.77756	8.91646	8.67262	8.94621	8.38686
15206054	9.54589	9.53958	9.72925	9.8648	9.9442	9.49639
15206082	4.88986	5.12097	5.23442	4.84126	4.82312	4.73317
15206094	5.67878	5.61337	5.8758	5.93249	6.3965	6.2219
15206098	7.5807	7.25608	7.49165	7.9456	8.10023	8.23291
15206104	10.0568	9.81574	10.0545	10.0455	9.69418	9.36112
15206131	5.87152	6.05934	6.05971	5.68181	5.66619	5.72908
15206135	6.88086	6.53371	6.6267	6.6226	6.34993	6.04856
15206144	5.13724	5.04171	5.0379	4.51942	4.72773	4.5754
15206154	6.01431	6.23488	5.84761	5.65173	5.89976	5.65019
15206157	6.2896	6.50209	6.09702	5.74856	5.84574	5.62997
15206161	3.60028	3.39521	3.40149	3.44207	3.38853	3.45843
15206173	7.36978	7.08114	7.25452	7.33825	7.10083	6.92764
15206191	7.74206	7.38992	7.83534	8.53724	8.35337	8.41519
15206202	8.6094	8.62873	8.86797	8.51485	8.56017	8.28412
15206249	5.18753	5.46629	5.00422	4.85649	4.93302	4.72007
15206271	6.4818	6.71222	6.30164	6.4276	6.12685	5.96128
15206278	4.37527	4.37003	4.20718	4.20691	4.15842	4.32909
15206302	10.7664	10.578	10.6086	10.7755	10.9252	10.91
15206307	8.37812	8.70319	8.52539	9.05115	9.54685	8.85519
15206316	5.92122	5.9716	6.12804	6.02527	6.30569	6.61068
15206323	4.35882	4.52105	4.31483	4.4374	4.2876	4.09248
15206332	8.80929	9.04729	8.90914	8.87914	9.12093	8.58266
15206356	11.1108	11.2247	11.289	10.8843	11.4066	11.2387
15206361	8.06772	7.80474	8.18768	8.51379	8.14631	8.23739
15206385	5.67918	5.6595	5.69246	6.0453	6.02782	6.01853
15206391	5.61284	5.81222	5.72968	5.49375	5.60772	5.34656
15206395	7.39308	7.38537	7.48079	7.95152	7.98617	7.97337
15206398	6.00563	6.09026	6.03117	6.09364	6.02071	6.05422
15206407	5.13713	4.9332	5.25438	5.55337	5.80163	6.01722
15206420	5.36545	5.31609	5.43665	5.08825	5.06544	4.79322
15206429	4.63423	4.65338	4.47544	4.50353	4.6387	4.45278
15206437	3.84071	3.51267	3.56872	3.36655	3.46224	3.30458
15206448	4.42899	4.77488	4.41114	4.2862	4.31884	4.1981
15206453	4.8631	4.63598	4.30417	4.34579	4.47917	4.3264
15206458	5.41653	5.38288	5.24411	5.95654	6.0073	6.20587
15206500	10.0178	9.87355	9.8616	9.54471	9.69104	9.11539
15206516	3.41769	3.48299	3.30095	3.39067	3.39493	3.28798
15206534	3.79528	3.57372	3.64554	3.73711	3.59544	3.68428
15206569	4.75923	4.87929	4.50193	4.9117	4.72209	4.55467
15206593	4.34902	4.0407	4.33717	4.29274	4.49883	4.93199
15206605	5.15579	5.18608	5.38475	5.09166	5.21839	5.01029
15206621	5.48343	5.14202	5.41301	5.21164	5.22958	5.04189
15206627	5.62327	5.54723	5.5809	5.03593	5.42066	5.23221
15206632	5.18015	5.27432	5.18898	4.9799	5.07802	4.99435
15206668	5.32607	5.7028	5.50561	5.13709	5.36911	5.29653
15206685	7.58383	7.20637	7.46285	7.55414	7.11306	7.24816
15206697	9.59158	9.27207	9.40518	9.44725	9.21311	8.80578
15206718	5.54843	5.4678	5.30625	5.73114	5.39172	5.31693
15206724	7.62948	7.40673	7.32417	7.27464	6.95206	6.86513
15206744	5.27572	5.52428	5.11051	4.96681	5.22064	5.00457
15206751	5.24634	5.26544	5.07289	5.02097	5.08494	4.77945
15206757	8.84618	8.5842	8.73975	8.39698	8.62681	8.17673
15206770	6.78225	6.48091	6.5693	7.00156	6.6448	6.54996
15206802	9.21409	9.15507	8.99814	8.82459	9.23691	8.65209
15206807	6.34738	6.69938	6.99036	6.17653	6.49963	5.98182
15206860	9.21546	9.0194	9.4214	8.59276	9.03582	8.54134
15206876	4.18647	4.323	4.20575	4.11162	3.97561	4.0722
15206878	8.49366	8.51719	8.43217	8.35578	8.46224	8.54314
15206899	4.67749	4.72037	4.71944	4.67876	4.9011	4.47535
15206904	6.71068	6.63646	6.83251	6.83236	6.68784	6.79706
15206922	8.51846	8.40781	8.42936	8.16111	7.8492	7.80436
15206935	6.36489	6.5423	6.4531	5.9183	6.42102	5.82538
15206943	8.08984	8.21139	7.95428	8.42749	8.20304	8.18323
15206946	5.61925	5.31141	5.1532	5.41147	5.04418	4.89736
15206959	4.4153	4.63607	4.34076	4.40608	4.3689	4.25624
15206964	5.30331	5.19384	5.06439	4.98746	5.03495	5.01799
15206975	7.54962	7.42718	7.43023	7.4861	7.45919	7.00658
15206989	5.63852	5.44079	5.28834	6.32377	5.58005	5.28707
15206995	5.71539	5.82082	5.40311	5.31398	5.17241	4.63253
15206998	6.68162	6.30858	6.48862	6.66094	6.2802	6.30505
15207013	4.71992	5.18758	4.88546	4.68678	4.73016	4.61396
15207023	9.28415	9.28358	9.25877	9.39847	9.3388	9.32335
15207051	9.63004	9.62631	9.55377	9.15888	9.47857	9.51972
15207057	6.46639	6.67276	6.70629	6.2432	6.42686	6.61315
15207065	9.07271	8.97072	8.89392	8.99951	8.41604	8.57788
15207067	7.33029	7.26766	7.27487	7.797	7.41853	7.45193
15207080	5.90601	5.77648	5.43525	5.68903	6.20911	6.14525
15207092	7.76443	7.69185	7.89648	7.49951	7.71889	7.60067
15207114	5.68533	6.07057	5.37294	5.34847	5.47576	5.1992
15207119	6.13239	6.10737	6.32453	7.19586	6.4343	6.54201
15207126	5.15783	5.38522	4.9611	5.02215	4.99793	4.8902
15207156	5.31429	5.39052	4.85766	4.78878	4.94441	4.55169
15207159	5.52995	5.65705	4.88351	5.0644	5.09374	5.01951
15207185	8.31582	8.157	8.28286	8.15729	8.15059	7.61015
15207187	4.32979	4.37299	4.26964	4.26237	4.25102	4.25745
15207199	6.9672	7.07306	6.76438	6.98041	6.68229	6.67188
15207212	5.90788	6.53101	7.09111	6.36184	7.18974	6.77983
15207218	3.6408	4.13661	3.896	3.81046	3.6629	3.57096
15207250	7.75867	7.29447	7.55283	7.89404	7.55091	7.35911
15207255	6.42104	6.36614	6.52647	6.6239	6.13828	6.53139
15207264	3.50072	3.83256	3.51426	3.65664	3.70923	3.60328
15207271	9.38501	9.21355	9.3161	9.09772	9.11619	8.66043
15207274	4.37513	4.50178	4.44149	4.51694	4.31946	4.37566
15207288	11.4335	11.5365	11.4407	11.4031	11.3928	11.322
15207294	9.45186	9.26083	9.46732	9.44673	9.40354	8.93052
15207312	9.50089	8.99903	9.19593	9.36551	9.13646	8.82456
15207326	4.88185	4.36414	4.83092	4.74527	4.48943	4.46688
15207329	9.67449	9.90784	9.69335	9.32598	9.60485	9.63264
15207344	7.84743	7.88957	8.25209	8.13553	8.25852	7.96162
15207391	6.32488	6.44841	6.23785	6.06871	6.05873	6.02283
15207400	4.6368	4.69366	4.31758	4.36809	4.26318	3.90192
15207413	5.89441	5.93151	5.94177	5.35674	5.61005	5.38962
15207419	3.80279	4.18372	3.96702	3.9675	4.00598	3.87479
15207426	5.40759	5.61128	5.58691	5.26024	5.20477	5.06387
15207432	4.84362	5.07973	4.90233	4.72616	4.86964	4.66787
15207442	4.90888	5.37674	5.22079	4.95991	4.99597	4.88504
15207450	4.46794	4.57332	4.35277	4.38622	4.24367	4.45134
15207456	4.6482	4.77915	4.55306	4.37804	4.45717	4.52613
15207463	6.09412	6.02041	5.93993	5.5472	5.80262	5.57423
15207484	4.12551	4.21594	4.05879	3.98533	4.03638	4.06816
15207493	4.25688	4.23544	4.13881	4.0873	4.2186	4.11483
15207502	4.49727	4.652	4.66272	4.25855	4.31765	4.2037
15207511	4.19743	4.75618	4.50508	4.20771	4.3642	4.33522
15207518	4.62204	4.67705	4.33101	4.21844	4.19622	4.13624
15207526	3.63187	3.50125	3.52973	3.46163	3.54051	3.37738
15207538	5.39946	5.73611	5.16866	5.13986	5.03047	5.27592
15207542	8.75439	8.66929	8.74211	8.69398	8.64783	8.63945
15207549	4.79511	4.87468	4.67673	4.63284	4.51138	4.59519
15207553	4.55059	4.72757	4.54365	4.50288	4.52664	4.31132
15207566	9.96348	10.1245	10.0839	10.0052	9.79112	9.7822
15207578	8.0755	8.24257	8.17151	8.35745	8.53007	8.97972
15207611	6.67833	6.62792	6.62513	6.49693	6.44711	6.22819
15207616	8.74832	8.74157	8.58928	8.46913	8.13581	8.42562
15207666	9.04069	8.80557	9.08563	8.61604	8.61554	8.35968
15207679	4.0428	4.02052	3.83906	4.04536	3.82024	3.76233
15207684	6.85769	6.70314	6.60741	6.42372	6.40293	6.78637
15207720	8.36564	8.33225	8.54049	8.60743	8.36304	7.88146
15207725	4.49481	4.35861	4.19894	4.30021	4.06995	4.15227
15207732	7.59502	6.97026	7.13692	7.39918	6.82519	7.08261
15207743	5.5163	5.82473	5.71774	5.43043	5.81696	5.50755
15207759	4.34411	4.63443	4.5424	4.3702	4.33831	4.31352
15207762	5.16579	5.2487	4.93779	4.86495	4.93048	4.8699
15207766	10.4022	10.448	10.4514	10.3794	10.0595	10.3867
15207789	5.26588	5.72416	5.27971	5.01165	5.08892	4.81095
15207799	7.12888	7.04633	6.92506	6.52424	6.71482	6.69842
15207813	4.9465	5.08389	4.88303	5.73017	5.74081	6.01936
15207826	9.54935	9.65026	9.8157	9.72311	9.38507	9.71303
15207871	4.90067	5.32454	4.89629	5.03601	4.95239	4.61108
15207881	9.35024	8.85453	8.95622	8.92064	8.40727	8.45954
15207884	4.78898	4.84472	4.36348	4.32984	4.40772	4.38257
15207890	6.1927	6.25155	6.47408	6.24428	6.13352	6.22308
15207899	3.84105	3.81744	3.74883	3.65739	3.65726	3.77357
15207910	3.84236	4.00252	3.6894	3.87014	3.8873	3.80683
15207920	5.67338	5.92682	5.98685	6.04968	6.0944	5.8895
15207949	4.6943	4.8027	4.77893	4.5439	4.6156	4.44935
15207952	4.05434	4.11834	4.01115	4.02405	4.06812	3.87131
15207955	4.15258	3.95871	4.056	3.84982	3.92499	3.96311
15207959	5.13256	5.05905	5.15187	4.95957	4.77444	4.60877
15207962	4.20126	4.14085	4.15077	3.92717	4.0503	4.00239
15207965	7.35755	7.46355	7.45142	7.57976	7.48963	7.28027
15207979	10.2101	10.3436	10.0599	10.8957	10.9582	10.7436
15207992	6.35214	6.41195	6.25562	6.00267	5.70327	5.8557
15207999	8.53188	8.60953	8.42575	8.40924	8.37003	8.50841
15208029	4.32182	4.70019	4.28141	4.35069	4.14693	4.29788
15208035	7.40984	7.3116	7.61479	7.58728	7.4953	7.68963
15208041	5.00586	5.201	4.9342	5.26487	5.19706	5.05865
15208061	5.38996	5.42948	5.01757	4.76287	4.94767	4.6453
15208071	5.48705	5.37871	5.03606	5.46113	5.31498	5.32992
15208093	5.2424	5.09594	5.18699	5.09396	5.19602	5.11038
15208108	6.10762	6.13611	5.94778	5.97515	5.78748	5.6292
15208111	9.36876	9.51934	9.53761	9.70916	9.41952	9.26675
15208134	4.33739	4.48649	4.2721	5.09288	4.68231	4.94992
15208156	5.61052	5.21711	5.18142	5.2302	5.09291	5.08585
15208185	5.61778	5.559	5.51272	5.64643	5.4091	5.93708
15208196	4.6442	4.88997	4.64877	4.41549	4.48192	4.44327
15208208	5.76911	5.74616	5.50187	5.61259	5.24387	5.42529
15208214	5.51828	5.66684	5.97011	5.95175	5.79745	5.66356
15208224	8.54977	8.91997	8.69219	8.28577	8.74264	8.68644
15208246	4.43762	4.4079	4.11934	4.11527	3.95532	3.98011
15208261	8.54914	8.3821	8.75093	8.08991	7.90396	8.43627
15208269	3.86154	4.00583	3.73312	3.73478	3.80234	3.69227
15208283	5.01758	5.22984	4.92711	4.72336	4.78722	4.66741
15208295	6.07898	6.04588	6.00057	6.03058	6.02262	6.18445
15208315	10.2276	10.3492	10.3403	10.4693	10.1428	10.0874
15208321	4.35425	4.98476	4.89495	4.69796	4.10033	4.53702
15208324	7.18709	7.0761	7.30833	6.80669	7.17395	6.81896
15208330	9.80197	9.541	9.81924	9.52711	9.89305	9.84053
15208338	3.69503	4.18199	3.81832	3.53041	3.72931	3.77814
15208342	3.93156	3.87439	3.83948	3.77167	3.72661	3.76041
15208344	4.63528	4.58352	4.52669	4.3789	4.42811	4.22796
15208361	8.55055	8.67373	8.51559	8.17004	8.44464	8.45046
15208375	8.19732	8.09342	8.02631	8.48122	7.87474	7.82299
15208382	3.97776	3.97634	3.99902	3.84905	3.94738	4.08394
15208390	3.91169	4.18071	3.91427	3.91021	3.91238	3.87618
15208401	4.15227	4.21323	4.08609	4.14154	4.28242	4.18364
15208403	6.23836	6.36563	6.53302	6.65966	6.58764	7.35452
15208422	9.07576	9.25863	9.26444	9.35738	9.44761	9.74475
15208468	7.69589	7.69569	8.23438	7.41745	6.65884	7.3169
15208470	5.80152	5.74416	6.19437	6.06772	6.41184	6.82743
15208484	9.74542	9.76381	9.74492	9.7139	9.76487	10.1234
15208510	11.4835	11.4329	11.4754	11.421	11.4252	11.3864
15208533	10.0137	10.0236	9.97945	9.58023	10.3034	9.724
15208538	8.36878	8.47437	8.45652	8.39671	8.1372	8.50438
15208561	5.18432	5.17575	5.01949	4.83077	4.92697	4.93713
15208570	8.77405	8.75736	8.80266	8.63571	8.65388	8.75927
15208592	6.66323	6.28908	6.94418	6.1854	6.16017	5.99019
15208600	7.00765	7.36921	7.34837	6.82139	7.16864	6.59407
15208606	4.95939	4.53904	5.10565	4.70836	4.65336	4.26589
15208611	9.81983	9.71712	9.75849	9.849	9.84061	9.62776
15208626	4.4904	4.4559	4.4585	4.50355	4.34396	4.68687
15208628	3.60174	3.44543	3.55661	3.46851	3.42262	3.53599
15208636	4.72033	4.86695	4.49015	4.5229	4.64603	4.672
15208640	4.4113	4.77284	4.42735	4.29782	4.33424	4.2185
15208645	3.45333	3.66665	3.44961	3.51243	3.48468	3.31659
15208648	4.55358	4.73031	4.42247	4.45351	4.52646	4.3743
15208652	4.72872	4.49411	4.50913	4.41984	4.40798	4.35335
15208656	3.96669	4.14228	3.81467	3.71402	3.60013	3.6457
15208688	8.52816	8.64419	8.7256	8.48716	8.57102	8.36887
15208692	3.59564	3.58051	3.69083	3.5277	3.62677	3.50663
15208695	4.78299	4.67262	4.81303	5.73231	5.0812	5.82256
15208700	4.29414	4.585	4.4202	4.46064	4.1686	4.32464
15208715	3.52199	3.93286	3.59653	3.66693	3.72908	3.46751
15208719	5.94123	5.79462	5.71692	5.4016	5.46971	5.13925
15208741	9.52827	9.5099	9.3687	9.23623	9.31036	9.17816
15208744	4.33778	3.85669	4.07002	4.19826	4.15311	4.3973
15208762	8.9045	8.79327	8.93282	8.99652	9.0371	9.45398
15208773	6.64662	7.02145	6.7233	7.14047	6.94851	7.29646
15208779	9.73596	9.77579	9.8117	9.72711	9.78199	9.75184
15208787	8.42549	8.57784	8.65327	8.31321	8.4507	8.5116
15208807	7.87237	7.72028	7.66262	7.37437	7.55011	7.11596
15208812	3.29834	3.22582	3.36901	3.30989	3.12497	3.36029
15208814	3.45757	3.64527	3.34471	3.46044	3.56378	3.6088
15208849	5.39262	5.77997	5.26751	6.68924	6.15863	6.07454
15208868	8.9472	9.16264	9.13968	8.6692	8.86475	9.26549
15208872	6.5302	6.83562	6.61451	7.036	7.23333	7.116
15208895	7.82016	8.29893	8.7008	8.08855	8.7338	8.25183
15208905	7.9007	7.63117	7.73405	8.23089	7.86334	8.02294
15208924	5.43718	5.61014	5.46459	5.18819	5.37081	5.35837
15208940	3.85113	4.01659	3.93526	3.89128	3.91201	3.80003
15208949	9.33769	9.25428	9.3438	9.28646	9.32598	9.27529
15208954	4.98809	5.08719	5.17557	4.91844	5.18167	5.1761
15208966	4.22841	4.51944	4.26509	4.15447	4.26693	4.22709
15208971	9.68372	9.67595	9.71121	9.7515	9.50145	9.40377
15208995	6.87646	6.28449	6.53371	6.52807	6.11432	6.12909
15209008	3.76314	3.88031	3.87966	3.8559	3.98941	3.86719
15209058	5.86833	5.43254	5.40956	5.93645	5.32549	5.25103
15209066	4.78425	4.8868	4.78666	4.66939	4.81108	4.73534
15209099	5.7186	5.18859	4.84209	5.01546	4.79096	4.59039
15209101	9.70398	9.74983	9.74582	9.62835	9.66632	9.94455
15209137	8.83928	9.1018	9.24952	8.55022	8.99567	8.67387
15209152	5.02561	4.70416	4.95926	4.82314	4.80854	4.66191
15209154	3.79957	3.43893	3.67036	3.49571	3.5816	3.32046
15209156	8.00862	8.05346	8.19797	8.05929	8.00724	7.81187
15209179	6.1186	5.53582	6.16849	5.65548	5.78372	5.41017
15209185	5.02973	5.00366	4.86413	4.88018	4.78816	5.01024
15209195	8.52739	8.50184	8.47145	8.73017	8.54819	8.35672
15209212	6.75732	6.4788	6.71036	6.63079	6.92019	6.25661
15209225	6.42409	5.85652	6.12409	5.61067	5.7553	5.65625
15209237	6.91671	6.70439	6.80621	6.8937	6.91911	6.55316
15209265	8.10257	7.65395	7.91238	7.88045	7.5662	7.1917
15209289	4.50589	4.6356	4.75656	4.77941	4.63185	4.84287
15209303	4.00668	4.17995	3.97319	4.37865	3.7806	4.15098
15209305	3.43998	3.58271	3.65707	3.49504	3.32052	3.73064
15209307	3.83233	4.38503	4.0878	4.11581	3.87644	4.4841
15209309	3.67826	3.74108	3.68296	3.51907	3.57409	3.38028
15209311	4.05349	4.53523	4.0131	3.84868	3.84816	3.81235
15209313	3.55996	3.52026	3.42011	3.44918	3.37247	3.24382
15209315	4.99725	4.93022	5.10847	4.69206	4.8325	4.91116
15209317	5.86791	6.08024	6.04777	5.78723	6.06025	6.1759
15209321	6.69859	7.00366	7.17427	6.53095	6.71777	6.82988
15209342	3.7169	3.9403	3.86545	3.60819	3.62612	3.73873
15209363	5.23147	4.72902	5.0722	5.04561	5.12799	4.65785
15209373	3.96457	4.5001	4.08372	3.99752	4.17603	4.15485
15209406	5.45238	5.18205	5.36983	5.25621	5.40285	5.31194
15209426	9.13613	9.17429	8.97582	9.05364	9.07803	9.13596
15209444	4.27089	4.07502	4.11264	3.71789	3.95028	3.93512
15209450	4.68915	4.92555	4.51672	4.39064	4.43647	4.21853
15209457	7.53878	7.21774	7.45193	7.38753	7.02925	6.93143
15209479	5.48812	5.52045	5.48204	5.54578	6.14009	5.7981
15209487	10.9589	10.8865	11.0098	11.0934	11.0899	10.9295
15209491	9.52268	9.54456	9.53529	9.59927	9.68258	9.30348
15209501	11.0306	11.1034	11.0442	10.9126	10.9603	10.7473
15209513	4.66337	4.30221	4.35483	4.11083	4.44172	4.1421
15209517	7.15015	7.42468	7.63261	7.0693	7.40724	7.12416
15209532	4.94396	5.00902	4.97858	5.01907	5.06398	4.89502
15209536	4.50237	4.36845	4.19242	4.33323	4.47263	4.31877
15209550	3.78501	3.90784	3.75629	3.63509	3.76958	3.62694
15209565	5.26164	5.11132	4.90603	5.08218	5.03748	4.74278
15209571	4.2885	4.16029	3.89079	3.83897	3.83417	3.94982
15209573	4.35371	4.19784	3.94662	4.06544	3.75045	3.91376
15209577	7.13585	7.00187	6.67868	6.20185	6.62892	6.50517
15209582	9.27664	9.02531	9.43052	9.5488	9.34204	9.31275
15209591	10.7484	10.5966	10.7431	11.1924	10.9681	11.0194
15209596	8.0759	7.57314	7.9971	7.31674	7.80047	7.75539
15209617	4.2566	4.42208	4.18593	4.09776	4.07289	4.27439
15209639	4.43459	4.51347	4.30458	4.32564	4.38903	4.22222
15209643	7.25097	7.28943	7.61558	7.24746	7.61274	6.94062
15209645	8.05427	8.07744	8.04613	7.77639	7.69363	7.77404
15209647	5.3677	5.1418	5.58144	6.02005	5.64079	5.87735
15209658	5.58672	5.35524	6.04776	5.67489	6.08703	5.95043
15209682	5.97134	5.92669	6.0985	5.66375	5.90502	5.63364
15209687	6.58846	6.57978	6.63336	6.88263	6.98702	7.06176
15209728	6.26543	6.38633	6.35436	6.24298	6.15148	6.10358
15209747	6.62385	6.33723	6.52008	6.51621	6.12957	6.20292
15209752	6.18806	6.30079	6.02672	5.77638	5.89376	5.80246
15209755	9.13718	9.06856	8.99101	8.98034	8.73743	8.76185
15209765	4.9241	4.94028	4.76713	4.61766	4.80302	4.89973
15209780	5.21146	4.72863	4.72095	5.22789	4.72934	4.84123
15209782	5.01142	5.22928	4.92699	4.74195	4.98172	4.7375
15209798	8.32541	8.28722	8.27481	8.46705	8.12814	7.36341
15209828	10.3357	10.5141	10.458	10.1293	10.3335	10.2378
15209841	5.07698	5.01909	5.05884	4.97046	4.94537	4.83202
15209846	4.51643	4.63739	4.59961	4.6073	4.61324	4.47678
15209855	6.84767	6.4207	6.68908	6.63474	6.24724	5.85723
15209871	6.21796	6.43278	6.17171	6.03033	6.20282	5.97859
15209892	4.97115	5.04205	4.91764	5.01759	4.8391	4.98317
15209898	3.56284	3.44126	3.26758	3.35712	3.65839	3.08781
15209908	7.91643	8.09633	8.1283	7.43646	7.87169	7.8487
15209911	3.59845	3.74247	3.48215	3.39154	3.54875	3.43727
15209915	4.15552	4.18677	3.93846	4.09722	3.98333	4.17754
15209957	4.75708	4.36918	4.50691	4.38169	4.33327	4.43864
15209970	3.78196	3.7336	3.99773	4.0817	3.73196	3.95598
15209972	5.26005	5.3759	5.19105	5.18203	5.04416	4.80983
15209985	5.83515	6.28376	6.20931	6.88997	6.8185	6.94491
15209992	4.00929	4.08402	3.89056	3.71484	3.83132	3.76382
15209999	7.87833	8.20968	7.70811	7.84869	7.66632	8.04236
15210001	5.90301	5.76031	5.73862	5.57668	5.98424	6.1818
15210006	8.77624	8.91233	8.83199	8.55489	8.56305	8.52661
15210012	9.96616	10.0196	10.2097	10.0301	10.4113	9.96068
15210018	7.11787	6.96459	6.86979	6.50862	6.72259	6.51512
15210061	4.81676	4.86033	5.0375	4.88032	4.88114	4.55216
15210069	5.21763	5.57927	5.62839	5.49178	5.43216	5.2856
15210075	5.57243	5.52714	5.68296	5.37697	5.37906	5.17519
15210078	4.74033	4.85613	4.71089	4.67112	4.67276	4.38846
15210096	10.8822	10.6097	10.6682	10.6783	10.2851	10.2205
15210106	5.04348	5.34251	5.21543	5.72064	5.79461	6.04015
15210125	10.9539	10.8738	10.9023	10.6934	10.681	10.6282
15210133	7.76222	7.68171	8.09003	7.75883	7.98678	7.26921
15210146	5.44606	5.3305	5.22238	5.44179	5.41724	5.29861
15210158	4.20946	4.54718	4.32197	4.1649	4.13944	4.12289
15210165	10.5636	10.9059	11.001	10.4176	10.9278	10.5517
15210186	4.94938	5.12933	4.75274	4.55458	4.68117	4.4235
15210200	10.4312	10.1928	10.1942	10.0685	10.0716	9.56657
15210256	5.05379	5.08047	5.19717	5.67327	5.59755	6.16288
15210313	5.58645	5.67001	5.58542	5.44731	5.37371	5.18613
15210336	9.39636	9.3067	9.07961	9.43024	9.1872	8.80252
15210345	5.04093	5.37782	4.99796	5.00041	4.84523	5.09153
15210360	7.06775	6.78833	6.7841	7.02551	6.69766	6.61292
15210377	7.38161	7.25668	7.07545	7.1352	6.95992	6.67836
15210456	9.98037	9.77041	9.85192	9.64076	9.67556	9.17858
15210459	6.1494	6.12857	6.09804	5.36954	5.99318	5.41548
15210461	7.32962	7.22367	7.341	7.48183	7.18688	6.76504
15210471	5.55207	5.3191	5.12783	4.93756	5.07858	5.07291
15210479	4.28585	4.59968	4.34801	4.00049	4.37513	4.09284
15210483	6.85533	6.71306	6.9239	6.71823	6.65601	6.42592
15210490	6.97249	6.85799	7.25809	7.65108	7.0441	7.13514
15210499	4.60274	5.05428	4.58113	5.00401	5.02233	5.0611
15210524	9.98541	9.89305	9.95843	9.86951	9.94306	10.0902
15210537	8.48428	8.35231	8.43709	8.3423	8.24031	8.1241
15210554	6.81683	6.33685	6.55584	6.82352	6.26119	6.09771
[truncated: 10,265 more rows]

## Sheet: Metadata Example
SERIES
title	Expression data from early Drosophila embryo
summary	Morphogenesis of epithelial tissues relies on the precise developmental control of cell polarity and architecture. In the early Drosophila embryo, the primary epithelium forms during cellularisation, following a tightly controlled genetic programme where specific sets of genes are up-regulated. Some of them, for instance, control membrane invagination between the nuclei anchored at the apical sur…
summary	We used microarrays to detail the global programme of gene expression underlying cellularisation and identified distinct classes of up-regulated genes during this process.
overall design	Drosophila embryos were selected at successive stages of early development for RNA extraction and hybridization on Affymetrix microarrays. We sought to obtain homogeneous populations of embryos at each developmental stage in order to increase the temporal resolution of expression profiles. To that end, we hand-selected embryos according to morphological criteria at five time-points: before pole c…
contributor	Jane,Doe
contributor	John,A,Smith
SAMPLES
# The corresponding example matrix table is included in the next worksheet.
Sample name	title	CEL file	source name	organism	characteristics: tissue	characteristics: genotype	characteristics: age	molecule	label	description	chip name or GEO platform id
Drosophila_T0-1	embryo at T0, biological rep1	Drosophila_T0-1.CEL	Drosophila embryos before nuclear cycle 9 (maternal transcripts)	Drosophila melanogaster	dechorionated embryo	yellow white and Oregon R parents	embryos younger than nuclear cycle 9, i.e. before pole cells budding	cDNA	biotin	Gene expression data from embryos younger than nuclear cycle 9, i.e. before zygotic genome activation.	DrosGenome1
Drosophila_T0-2	embryo at T0, biological rep2	Drosophila_T0-2.CEL	Drosophila embryos before nuclear cycle 9 (maternal transcripts)	Drosophila melanogaster	dechorionated embryo	yellow white and Oregon R parents	embryos younger than nuclear cycle 9, i.e. before pole cells budding	total RNA	biotin	Gene expression data from embryos younger than nuclear cycle 9, i.e. before zygotic genome activation.	DrosGenome1
Drosophila_T1-1	embryo at T1, biological rep1	Drosophila_T1-1.CEL	Drosophila embryos in slow phase of cellularisation	Drosophila melanogaster	dechorionated embryo	yellow white and Oregon R parents	embryos younger than nuclear cycle 9, i.e. before pole cells budding	total RNA	biotin	Gene expression data from embryos in slow phase of cellularisation.	DrosGenome1
Drosophila_T1-2	embryo at T1, biological rep2	Drosophila_T1-2.CEL	Drosophila embryos in slow phase of cellularisation	Drosophila melanogaster	dechorionated embryo	yellow white and Oregon R parents	embryos younger than nuclear cycle 9, i.e. before pole cells budding	total RNA	biotin	Gene expression data from embryos in slow phase of cellularisation.	DrosGenome1
Drosophila_T2-1	embryo at T2, biological rep1	Drosophila_T2-1.CEL	Drosophila embryos in fast phase of cellularisation	Drosophila melanogaster	dechorionated embryo	yellow white and Oregon R parents	embryos younger than nuclear cycle 9, i.e. before pole cells budding	total RNA	biotin	Gene expression data from embryos in slow phase of cellularisation.	DrosGenome1
Drosophila_T2-2	embryo at T2, biological rep2	Drosophila_T2-2.CEL	Drosophila embryos in fast phase of cellularisation	Drosophila melanogaster	dechorionated embryo	yellow white and Oregon R parents	embryos younger than nuclear cycle 9, i.e. before pole cells budding	total RNA	biotin	Gene expression data from embryos in slow phase of cellularisation.	DrosGenome1
Drosophila_T3-1	embryo at T3, biological rep1	Drosophila_T3-1.CEL	Drosophila embryos at beginning of gastrulation	Drosophila melanogaster	dechorionated embryo	yellow white and Oregon R parents	embryos younger than nuclear cycle 9, i.e. before pole cells budding	total RNA	biotin	Gene expression data from embryos in slow phase of cellularisation.	DrosGenome1
Drosophila_T3-2	embryo at T3, biological rep2	Drosophila_T3-2.CEL	Drosophila embryos at beginning of gastrulation	Drosophila melanogaster	dechorionated embryo	yellow white and Oregon R parents	embryos younger than nuclear cycle 9, i.e. before pole cells budding	total RNA	biotin	Gene expression data from embryos in slow phase of cellularisation.	DrosGenome1
Drosophila_T4-1	embryo at T4, biological rep1	Drosophila_T4-1.CEL	Drosophila embryos at end of gastrulation	Drosophila melanogaster	dechorionated embryo	yellow white and Oregon R parents	embryos younger than nuclear cycle 9, i.e. before pole cells budding	total RNA	biotin	Gene expression data from embryos in slow phase of cellularisation.	DrosGenome1
Drosophila_T4-2	embryo at T4, biological rep2	Drosophila_T4-2.CEL	Drosophila embryos at end of gastrulation	Drosophila melanogaster	dechorionated embryo	yellow white and Oregon R parents	embryos younger than nuclear cycle 9, i.e. before pole cells budding	total RNA	biotin	Gene expression data from embryos in slow phase of cellularisation.	DrosGenome1
PROTOCOLS
growth protocol	30 min egg collections of OreR and yw flies at 25C were aged at room temperature (RT) according to the different temporal classes T0-T4.
treatment protocol	Embryos were dechorionated with 50% bleach, put on a cover slip and covered with Halocarbon oil 27 (Sigma). Embryos of the appropriate stage were manually selected under the dissecting scope. Selected embryos were transferred to a basket, rinsed with PBS with 0,7% NaCl, 0,04% triton-X100 and placed on ice in the Trizol solution (GibcoBRL).
extract protocol	Trizol extraction of total RNA was performed according to the manufacturer's instructions.
label protocol	Biotinylated cRNA were prepared according to the standard Affymetrix protocol from 6 ug total RNA (Expression Analysis Technical Manual, 2001, Affymetrix).
hyb protocol	Following fragmentation, 10 ug of cRNA were hybridized for 16 hr at 45C on GeneChip Drosophila Genome Array. GeneChips were washed and stained in the Affymetrix Fluidics Station 400.
scan protocol	GeneChips were scanned using the Hewlett-Packard GeneArray Scanner G2500A.
data processing	The data were analyzed with Microarray Suite version 5.0 (MAS 5.0) using Affymetrix default analysis settings and global scaling as normalization method. The trimmed mean target intensity of each array was arbitrarily set to 100.
value definition	MAS5.0 signal intensity

## Sheet: Matrix Example 1
# truncated example of a matrix table with signal estimates only
# additional columns can be added for each sample/hyb (see 'Matrix Example 2' for illustration)
ID_REF	Drosophila_T0-1	Drosophila_T0-2	Drosophila_T1-1	Drosophila_T1-2	Drosophila_T2-1	Drosophila_T2-2	Drosophila_T3-1	Drosophila_T3-2	Drosophila_T4-1	Drosophila_T4-2
141200_at	867.2	823.6	784.7	82.4	702.9	733	872.5	791.8	842.2	663.4
141201_at	70.1	80.3	106.4	31.4	75.3	64.6	81.3	83.2	72.7	51.8
141202_at	19.2	30.7	17.8	75.2	28.5	19.3	35.2	29.9	28.5	24
141203_at	212.9	212	243.2	67.9	187.4	217.4	222.1	230	286	221
141204_at	9.5	9.6	7.8	87.8	2.1	7.8	16.8	6.2	12.5	2.6
141205_at	63.4	67.2	51.1	14	57.3	59.5	81.3	56.4	66.4	43
141206_at	35.6	35.1	25	20.7	22.1	22.1	36.8	34.1	27.2	20.7
141207_at	6.9	20.7	16.7	23.9	28.8	14.7	20.4	20	12.1	18.5
141208_at	13.1	4.9	6.3	67.8	4.3	4.7	3.8	9.6	6.8	16.8
141209_at	12.4	12.2	5	56.6	9	11.5	16.6	12.2	11.6	5
141210_at	59.4	66.9	50.4	150.5	66.7	87	77.4	58	40.3	44
141211_at	154.2	212.8	148	51.9	135.4	176.9	199.2	140.1	154.2	137.1
141212_at	66.3	61.1	61.6	134.2	48.6	80.4	72.8	64.7	54.2	51.2
141213_at	107.2	111.9	131.9	22.4	105.5	139.8	138	131.1	122.5	107.1
141214_at	126.5	185.5	169.5	94.4	183.4	149.3	191.8	181.8	186.2	162
141215_at	154.8	168.8	138.7	105.5	153.8	132.5	100	133.9	147.1	136.1
141216_at	37.4	43.3	36.5	24.4	44	26.1	53.4	42.5	27.8	33.8
141217_at	33.7	18.9	27.6	49.3	30.3	15	32.5	23.8	32.2	35.8
141218_at	380.2	405	311.7	31.1	334.7	359.3	438.3	322.2	377.7	323
141219_at	82.8	81.6	63.7	112.8	58.8	68.6	80.1	74.3	68	69.2
141220_at	368.8	384.2	327.7	33.7	403.4	392.5	347.2	341.8	347.3	373.9
141221_at	1257.1	1444.7	1371	36	1285.2	1060.1	1257.1	1026.9	1300.4	1219
141222_at	1977.7	1984.5	1919	137.8	1560.2	1937.3	2363.2	2197.7	1878.4	2045.2
141223_at	3096.7	2691.9	2732.2	40.7	2473.9	2608.1	2712.3	2636.9	2578	2935.6
141224_at	985.2	1135.4	1034.5	37	1071.8	1079.9	1179.2	990.5	1082.7	1183.3
141225_at	805.4	725.1	748.4	65.3	729.2	746.9	773.8	773.4	727.1	816.1
141226_at	1215.1	1203.6	1295.6	121.4	1173.5	1151.6	1109	1225	1270	1258
141227_at	1112.6	950.5	1190.6	119	989.6	981.6	1008.9	1002.5	922.3	1010.3
141228_at	472.2	512.4	465	154.2	436.1	421.9	455.8	480.7	452	477.8
141229_at	829.4	947.4	942	90.2	757.2	733.2	964.5	792.9	839.8	891
141230_at	2155.2	1787.1	2395	44.3	2150.6	1955.3	1712.1	1934.7	2129.3	2027.3
141231_at	376.1	391.4	348	110.3	357.6	373	312.9	373.3	353.3	368.7
141232_at	1435.6	1159.8	1169.3	30	1006.5	1170.7	1458.7	1278.4	1062.6	1187.8
141233_at	2130.6	1994.6	1984.1	104.5	1772.6	1990.3	1960.6	2185.2	1991.3	2365.5
141234_at	463.9	478.2	548.1	22.4	489.8	526.8	502.3	527.1	521.3	558.1
141235_at	1274.9	1215.9	1320.7	43.6	1156.9	1031.8	1224.8	1162	1192.8	1199.1
141236_at	2104.9	2061.8	2492.4	38.5	2061.3	2016.3	1992.6	2011.4	2006.2	1944.6
141237_at	2954.9	1907.4	1970.9	15.2	2022.3	2358.6	1811.1	2276.3	1384.7	1732.9
141238_at	1363.8	1325.9	1151.6	40.8	1108.1	1340.7	1071.8	1264.1	1274.4	1519.8
141239_at	2395.9	2425.8	2226.2	51	2114.6	2291.2	2381.6	2221.5	2391.7	2373.9
141240_at	390.8	406.8	388	19.7	503.3	406.3	382	351.9	414.3	412
141241_at	3155.1	3399.5	3532.9	60.9	2993.9	3381.2	5137.2	3308.4	3081.9	3058.9
141242_at	1994.5	2024.5	2059.9	86.3	1760.6	1847.8	2079.8	2066	2000	2371.7
141243_at	421.7	380.7	384.4	157.2	370.4	378.4	323.1	391.1	377.5	429.3
141244_at	2175.2	1679.1	1872.8	90.2	1603.2	1705.8	1843	1857.1	1779.4	2199.1
141245_at	2767.3	2421.4	2367.9	142.5	2073.5	2294.5	2244.7	2265.1	2217.5	2387.1
141246_at	2540.1	2279.1	2062.3	130	1648.5	1708.6	2322	2063.5	1671.1	2263.9
141247_at	288.6	305.3	338.2	108.1	308.1	314.4	303.3	355.5	335.8	347.3
141248_at	425.7	427.4	438.8	15.2	478	449.2	411.1	411.5	399.6	426.4
141249_at	2700.1	2293.5	2134.3	71.6	2199.6	2201.5	2485.9	2110.2	1966.3	2389.6
141249_at	2700.1	2293.5	2134.3	71.6	2199.6	2201.5	2485.9	2110.2	1966.3	2389.6

## Sheet: Matrix Example 2
# truncated example of a matrix table
# The ABS_CALL and DETECTION P-VALUE columns are optional and included for example purposes only
ID_REF	Drosophila_T0-1	ABS_CALL	DETECTION P-VALUE	Drosophila_T0-2	ABS_CALL	DETECTION P-VALUE	Drosophila_T1-1	ABS_CALL	DETECTION P-VALUE	Drosophila_T1-2	ABS_CALL	DETECTION P-VALUE	Drosophila_T2-1	ABS_CALL	DETECTION P-VALUE	Drosophila_T2-2	ABS_CALL	DETECTION P-VALUE	Drosophila_T3-1	ABS_CALL	DETECTION P-VALUE	Drosophila_T3-2	ABS_CALL	DETECTION P-VALUE	Drosophila_T4-1	ABS_CALL	DETECTION P-VALUE	Drosophila_T4-2	ABS_CALL	DETECTION P-VALUE
141200_at	867.2	P	0.000219	823.6	P	0.000219	784.7	P	0.000266	82.4	A	0.066865	702.9	P	0.000219	733	P	0.000219	872.5	P	0.000266	791.8	P	0.000266	842.2	P	0.000266	663.4	P	0.000219
141201_at	70.1	P	0.001892	80.3	P	0.001892	106.4	P	0.013092	31.4	A	0.066865	75.3	P	0.001892	64.6	P	0.000805	81.3	P	0.019304	83.2	P	0.000959	72.7	P	0.00418	51.8	P	0.003067
141202_at	19.2	A	0.250724	30.7	A	0.127645	17.8	A	0.175989	75.2	A	0.066865	28.5	A	0.162935	19.3	A	0.175989	35.2	A	0.267463	29.9	A	0.098054	28.5	A	0.11716	24	A	0.066865
141203_at	212.9	P	0.002617	212	P	0.00418	243.2	P	0.003067	67.9	A	0.066865	187.4	P	0.002228	217.4	P	0.002228	222.1	P	0.002228	230	P	0.005643	286	P	0.001892	221	P	0.001354
141204_at	9.5	A	0.397994	9.6	A	0.32083	7.8	A	0.339558	87.8	A	0.066865	2.1	A	0.660442	7.8	A	0.458816	16.8	A	0.47938	6.2	A	0.418069	12.5	A	0.127645	2.6	A	0.458816
141205_at	63.4	P	0.024711	67.2	P	0.014937	51.1	P	0.035163	14	A	0.066865	57.3	P	0.014937	59.5	P	0.043968	81.3	P	0.043968	56.4	P	0.031336	66.4	P	0.021866	43	P	0.02786
141206_at	35.6	P	0.019304	35.1	P	0.014937	25	M	0.05447	20.7	A	0.066865	22.1	A	0.11716	22.1	P	0.011447	36.8	P	0.017001	34.1	P	0.031336	27.2	P	0.003585	20.7	A	0.107301
141207_at	6.9	A	0.561639	20.7	A	0.218983	16.7	A	0.52062	23.9	A	0.066865	28.8	A	0.234557	14.7	A	0.397994	20.4	A	0.479377	20	A	0.397994	12.1	A	0.397994	18.5	A	0.378184
141208_at	13.1	A	0.088557	4.9	A	0.437646	6.3	A	0.318883	67.8	A	0.067627	4.3	A	0.437646	4.7	A	0.275462	3.8	A	0.911443	9.6	A	0.34162	6.8	A	0.181343	16.8	A	0.135974
141209_at	12.4	P	0.043968	12.2	P	0.048995	5	A	0.267463	56.6	A	0.067627	9	A	0.175989	11.5	A	0.089405	16.6	A	0.204022	12.2	A	0.162935	11.6	A	0.138765	5	A	0.189687
141210_at	59.4	P	0.031336	66.9	P	0.017001	50.4	M	0.05447	150.5	A	0.067627	66.7	P	0.02786	87	P	0.008689	77.4	A	0.081337	58	A	0.07383	40.3	A	0.089405	44	A	0.066865
141211_at	154.2	P	0.011447	212.8	P	0.009985	148	P	0.013092	51.9	A	0.067627	135.4	P	0.011447	176.9	P	0.011447	199.2	P	0.02786	140.1	P	0.014937	154.2	P	0.011447	137.1	P	0.011447
141212_at	66.3	P	0.043968	61.1	M	0.05447	61.6	P	0.031336	134.2	A	0.067627	48.6	P	0.014937	80.4	P	0.039365	72.8	M	0.05447	64.7	P	0.035163	54.2	P	0.02786	51.2	A	0.066865
141213_at	107.2	A	0.138765	111.9	A	0.081337	131.9	M	0.05447	22.4	A	0.067627	105.5	A	0.07383	139.8	A	0.07383	138	A	0.107301	131.1	M	0.060419	122.5	A	0.07383	107.1	P	0.031336
141214_at	126.5	P	0.014937	185.5	P	0.009985	169.5	P	0.014937	94.4	A	0.067627	183.4	P	0.011447	149.3	P	0.014937	191.8	P	0.017001	181.8	P	0.011447	186.2	P	0.014937	162	P	0.013092
141215_at	154.8	P	0.001354	168.8	P	0.000805	138.7	P	0.000805	105.5	A	0.067627	153.8	P	0.000959	132.5	P	0.000805	100	P	0.003067	133.9	P	0.000562	147.1	P	0.001354	136.1	P	0.001354
141216_at	37.4	P	0.019304	43.3	P	0.035163	36.5	P	0.039365	24.4	A	0.067627	44	P	0.013092	26.1	P	0.014937	53.4	A	0.089405	42.5	P	0.013092	27.8	P	0.019304	33.8	P	0.019304
141217_at	33.7	A	0.218983	18.9	A	0.284747	27.6	A	0.32083	49.3	A	0.067627	30.3	A	0.11716	15	A	0.438361	32.5	A	0.267463	23.8	A	0.32083	32.2	A	0.162935	35.8	A	0.107301
141218_at	380.2	P	0.013092	405	P	0.009985	311.7	P	0.019304	31.1	A	0.067627	334.7	P	0.008689	359.3	P	0.017001	438.3	P	0.02786	322.2	P	0.02786	377.7	P	0.017001	323	P	0.014937
141219_at	82.8	P	0.001602	81.6	P	0.001354	63.7	P	0.002617	112.8	A	0.067627	58.8	P	0.003067	68.6	P	0.004863	80.1	P	0.004863	74.3	P	0.002617	68	P	0.003067	69.2	P	0.001602
141220_at	368.8	P	0.000244	384.2	P	0.000244	327.7	P	0.000244	33.7	A	0.067627	403.4	P	0.000244	392.5	P	0.000244	347.2	P	0.000244	341.8	P	0.000244	347.3	P	0.000244	373.9	P	0.000244
141221_at	1257.1	P	0.000244	1444.7	P	0.000244	1371	P	0.000244	36	A	0.067627	1285.2	P	0.000244	1060.1	P	0.000244	1257.1	P	0.001221	1026.9	P	0.001221	1300.4	P	0.001221	1219	P	0.000244
141222_at	1977.7	P	0.000244	1984.5	P	0.000244	1919	P	0.000244	137.8	A	0.067627	1560.2	P	0.000244	1937.3	P	0.000244	2363.2	P	0.000244	2197.7	P	0.000244	1878.4	P	0.000244	2045.2	P	0.000244
141223_at	3096.7	P	0.000244	2691.9	P	0.000244	2732.2	P	0.000244	40.7	A	0.067627	2473.9	P	0.000244	2608.1	P	0.000244	2712.3	P	0.000244	2636.9	P	0.000244	2578	P	0.000244	2935.6	P	0.000244
141224_at	985.2	P	0.000244	1135.4	P	0.000244	1034.5	P	0.000244	37	A	0.067627	1071.8	P	0.000244	1079.9	P	0.000244	1179.2	P	0.000244	990.5	P	0.000244	1082.7	P	0.000244	1183.3	P	0.000244
141225_at	805.4	P	0.000244	725.1	P	0.000244	748.4	P	0.000244	65.3	A	0.067627	729.2	P	0.000244	746.9	P	0.000244	773.8	P	0.000244	773.4	P	0.000244	727.1	P	0.000244	816.1	P	0.000244
141226_at	1215.1	P	0.000244	1203.6	P	0.000244	1295.6	P	0.000244	121.4	A	0.067627	1173.5	P	0.000244	1151.6	P	0.000244	1109	P	0.000732	1225	P	0.000244	1270	P	0.000244	1258	P	0.000244
141227_at	1112.6	P	0.000244	950.5	P	0.000244	1190.6	P	0.000244	119	A	0.067627	989.6	P	0.000244	981.6	P	0.000244	1008.9	P	0.000244	1002.5	P	0.000244	922.3	P	0.000244	1010.3	P	0.000244
141228_at	472.2	P	0.000244	512.4	P	0.000244	465	P	0.000244	154.2	A	0.067627	436.1	P	0.000244	421.9	P	0.000244	455.8	P	0.000244	480.7	P	0.000244	452	P	0.000244	477.8	P	0.000244
141229_at	829.4	P	0.000244	947.4	P	0.000244	942	P	0.000244	90.2	A	0.067627	757.2	P	0.000244	733.2	P	0.000244	964.5	P	0.000244	792.9	P	0.000244	839.8	P	0.000244	891	P	0.000244
141230_at	2155.2	P	0.000244	1787.1	P	0.000244	2395	P	0.000244	44.3	A	0.067627	2150.6	P	0.000244	1955.3	P	0.000244	1712.1	P	0.000244	1934.7	P	0.000244	2129.3	P	0.000244	2027.3	P	0.000244
141231_at	376.1	P	0.000244	391.4	P	0.000244	348	P	0.000244	110.3	A	0.067627	357.6	P	0.000244	373	P	0.000244	312.9	P	0.00293	373.3	P	0.000244	353.3	P	0.000244	368.7	P	0.000244
141232_at	1435.6	P	0.000244	1159.8	P	0.000244	1169.3	P	0.000244	30	A	0.067627	1006.5	P	0.000244	1170.7	P	0.000244	1458.7	P	0.000244	1278.4	P	0.000244	1062.6	P	0.000244	1187.8	P	0.000244
141233_at	2130.6	P	0.000244	1994.6	P	0.000244	1984.1	P	0.000244	104.5	A	0.067627	1772.6	P	0.000244	1990.3	P	0.000244	1960.6	P	0.000244	2185.2	P	0.000244	1991.3	P	0.000244	2365.5	P	0.000244
141234_at	463.9	P	0.000244	478.2	P	0.000244	548.1	P	0.000244	22.4	A	0.067627	489.8	P	0.000244	526.8	P	0.000244	502.3	P	0.000244	527.1	P	0.000244	521.3	P	0.000244	558.1	P	0.000244
141235_at	1274.9	P	0.000244	1215.9	P	0.000244	1320.7	P	0.000244	43.6	A	0.067627	1156.9	P	0.000244	1031.8	P	0.000244	1224.8	P	0.000244	1162	P	0.000244	1192.8	P	0.000244	1199.1	P	0.000244
141236_at	2104.9	P	0.000244	2061.8	P	0.000244	2492.4	P	0.000244	38.5	A	0.067627	2061.3	P	0.000244	2016.3	P	0.000244	1992.6	P	0.000244	2011.4	P	0.000244	2006.2	P	0.000244	1944.6	P	0.000244
141237_at	2954.9	P	0.000732	1907.4	P	0.000732	1970.9	P	0.000732	15.2	A	0.067627	2022.3	P	0.000244	2358.6	P	0.000732	1811.1	P	0.000732	2276.3	P	0.000244	1384.7	P	0.000732	1732.9	P	0.000732
141238_at	1363.8	P	0.000244	1325.9	P	0.000244	1151.6	P	0.000244	40.8	A	0.067627	1108.1	P	0.000244	1340.7	P	0.000244	1071.8	P	0.000244	1264.1	P	0.000244	1274.4	P	0.000244	1519.8	P	0.000244
141239_at	2395.9	P	0.000244	2425.8	P	0.000244	2226.2	P	0.000244	51	A	0.067627	2114.6	P	0.000244	2291.2	P	0.000244	2381.6	P	0.000244	2221.5	P	0.000244	2391.7	P	0.000244	2373.9	P	0.000244
141240_at	390.8	P	0.000732	406.8	P	0.000244	388	P	0.000244	19.7	A	0.067627	503.3	P	0.000244	406.3	P	0.000244	382	P	0.000244	351.9	P	0.000244	414.3	P	0.000244	412	P	0.000244
141241_at	3155.1	P	0.001221	3399.5	P	0.001221	3532.9	P	0.000732	60.9	A	0.067627	2993.9	P	0.001221	3381.2	P	0.001221	5137.2	P	0.001221	3308.4	P	0.001221	3081.9	P	0.001221	3058.9	P	0.001221
141242_at	1994.5	P	0.000244	2024.5	P	0.000732	2059.9	P	0.000732	86.3	A	0.067627	1760.6	P	0.000244	1847.8	P	0.000244	2079.8	P	0.000732	2066	P	0.000244	2000	P	0.000732	2371.7	P	0.000244
141243_at	421.7	P	0.000244	380.7	P	0.000244	384.4	P	0.000244	157.2	A	0.067627	370.4	P	0.000244	378.4	P	0.000244	323.1	P	0.000244	391.1	P	0.000244	377.5	P	0.000244	429.3	P	0.000244
141244_at	2175.2	P	0.000244	1679.1	P	0.000732	1872.8	P	0.000732	90.2	A	0.067627	1603.2	P	0.000732	1705.8	P	0.000244	1843	P	0.001221	1857.1	P	0.000732	1779.4	P	0.000732	2199.1	P	0.000244
141245_at	2767.3	P	0.000244	2421.4	P	0.000244	2367.9	P	0.000244	142.5	A	0.067627	2073.5	P	0.000244	2294.5	P	0.000244	2244.7	P	0.000244	2265.1	P	0.000244	2217.5	P	0.000244	2387.1	P	0.000244
141246_at	2540.1	P	0.000732	2279.1	P	0.001221	2062.3	P	0.001221	130	A	0.067627	1648.5	P	0.000732	1708.6	P	0.000732	2322	P	0.000732	2063.5	P	0.000732	1671.1	P	0.000732	2263.9	P	0.000732
141247_at	288.6	P	0.000244	305.3	P	0.000244	338.2	P	0.000244	108.1	A	0.067627	308.1	P	0.000244	314.4	P	0.000244	303.3	P	0.000244	355.5	P	0.000244	335.8	P	0.000244	347.3	P	0.000244
141248_at	425.7	P	0.000244	427.4	P	0.000244	438.8	P	0.000244	15.2	A	0.067627	478	P	0.000244	449.2	P	0.000244	411.1	P	0.000244	411.5	P	0.000244	399.6	P	0.000244	426.4	P	0.000244
141249_at	2700.1	P	0.000244	2293.5	P	0.000244	2134.3	P	0.000244	71.6	A	0.067627	2199.6	P	0.000244	2201.5	P	0.000244	2485.9	P	0.000244	2110.2	P	0.000244	1966.3	P	0.000244	2389.6	P	0.000244
